# Supplementary material for: Synthesis of tetrahydroberberine N,N-derived O-acetamides
Source: Preprints.org preprint supplement (doi:10.20944/preprints202407.1047.v1), 2024-07-13

## **Synthesis of tetrahydroberberine *N,N*-derived *O*-acetamides**

**Ivan V. Nечepurenko \*, Nina I. Komarova, Nariman F. Salakhutdinov**

*Vorozhtsov Novosibirsk Institute of Organic Chemistry, Siberian Branch, Russian Academy of Sciences, Novosibirsk, 630090 Russia*

*\*e-mail: niv@nioch.nsc.ru*

**Supporting Info**

**Fig. S1.** Spectrum of Compound **3a**,  $^1\text{H}$  NMR (400 MHz, DMSO- $d_6$ )

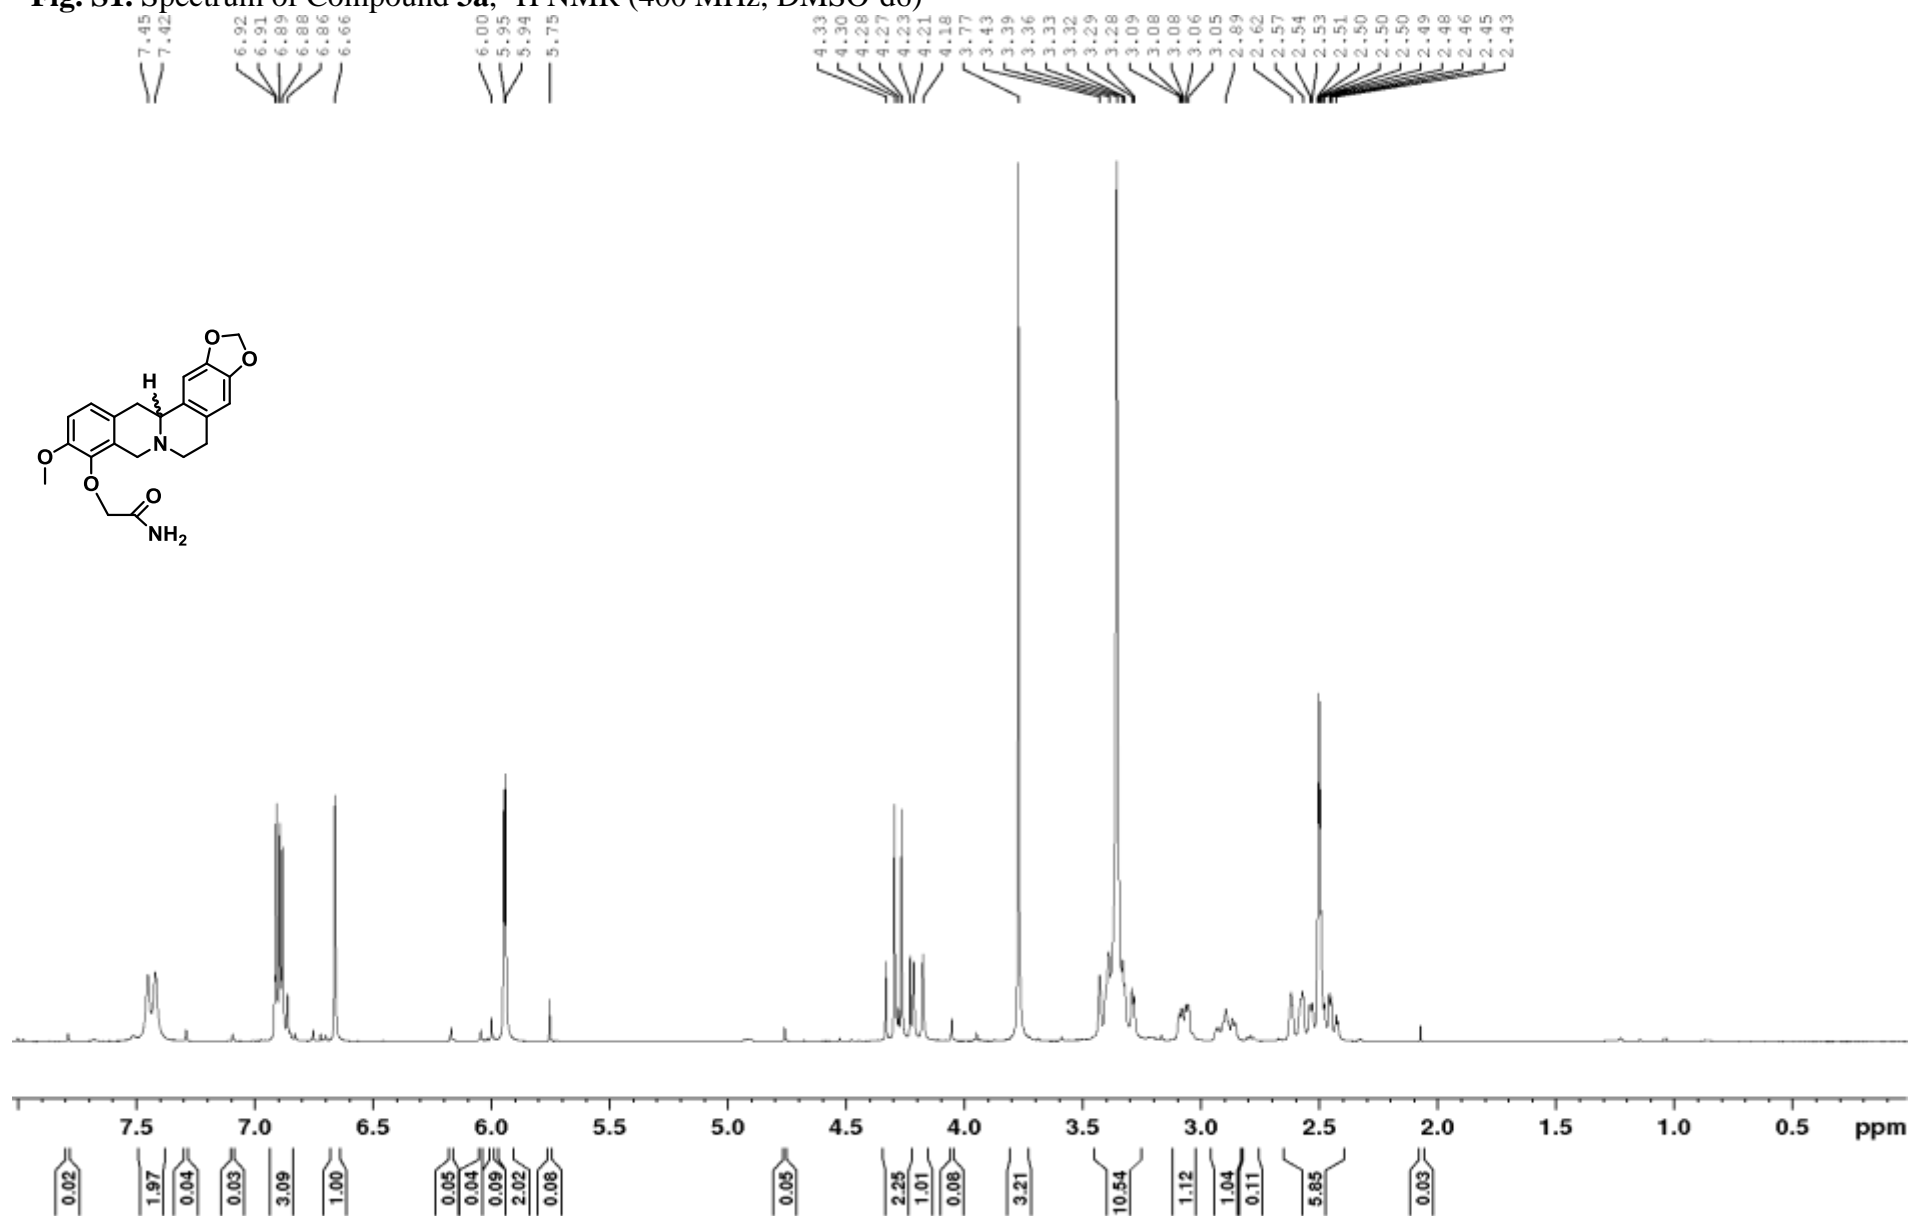

**Fig. S2.** Spectrum of Compound **3a**,  $^{13}\text{C}$  NMR, (100 MHz, DMSO- $d_6$ )

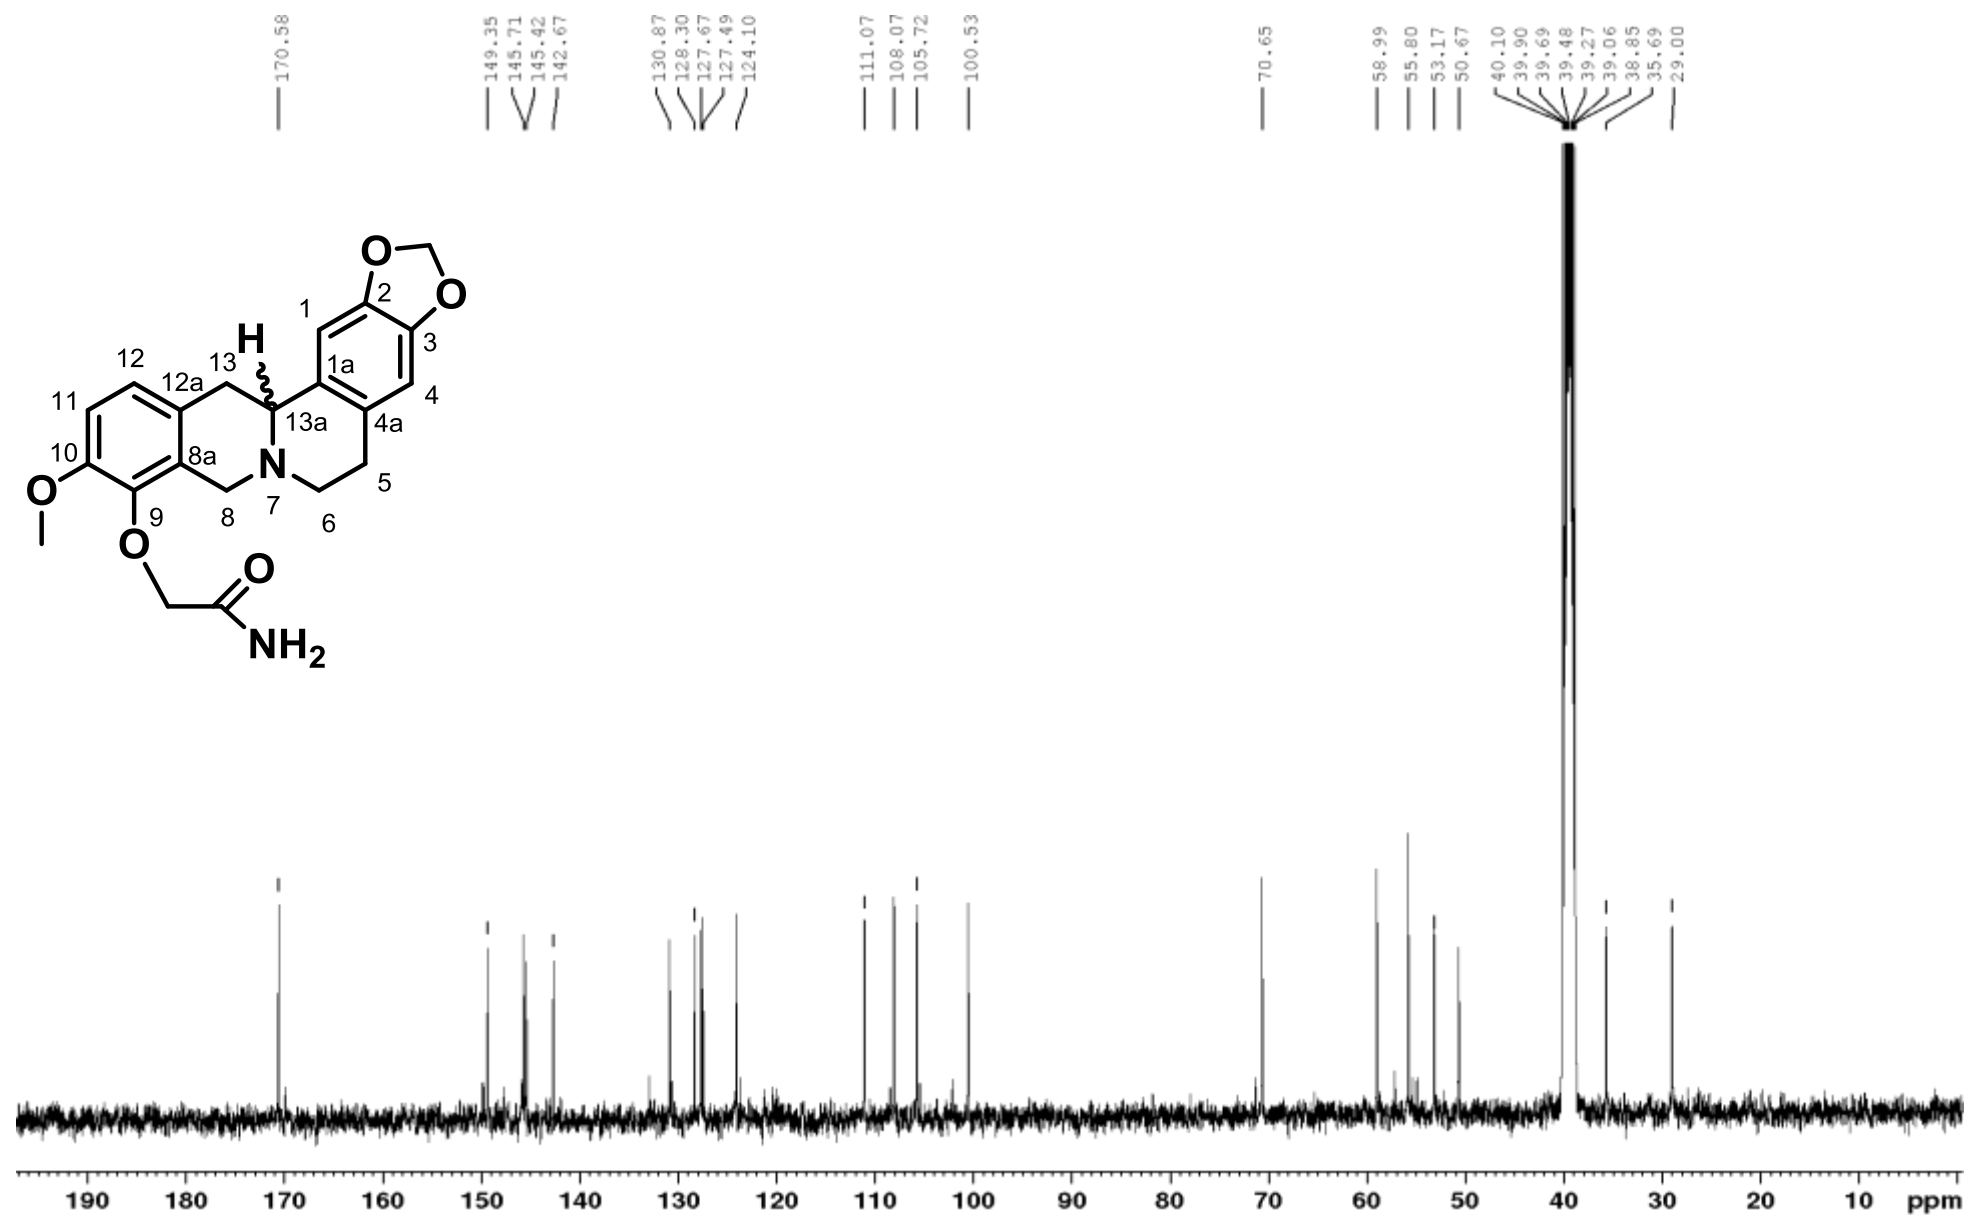

**Fig. S3.** Spectrum of Compound **3b**,  $^1\text{H}$  NMR (400 MHz,  $\text{CDCl}_3$ )

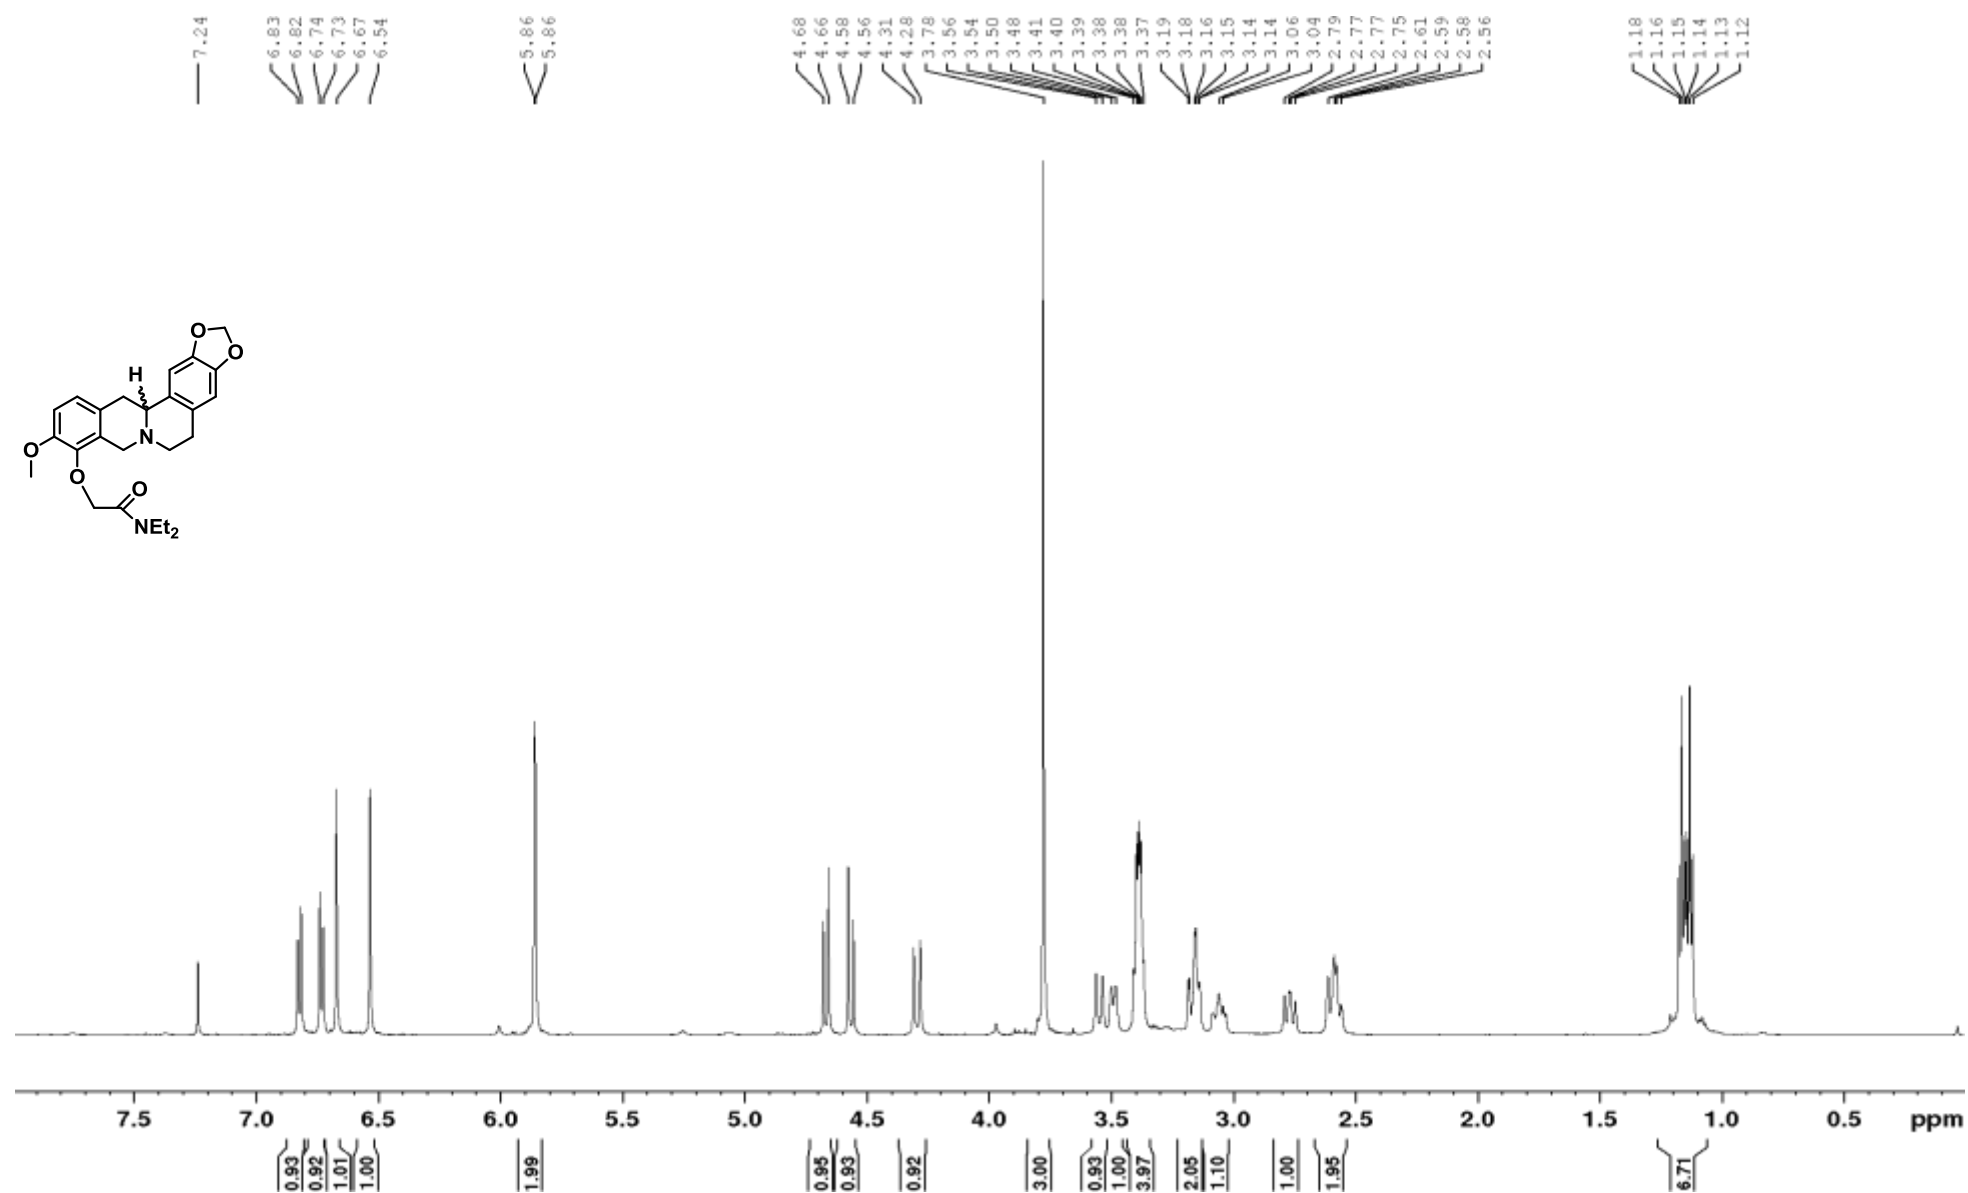

**Fig. S4.** Spectrum of Compound **3b**,  $^{13}\text{C}$  NMR (100 MHz,  $\text{CDCl}_3$ )

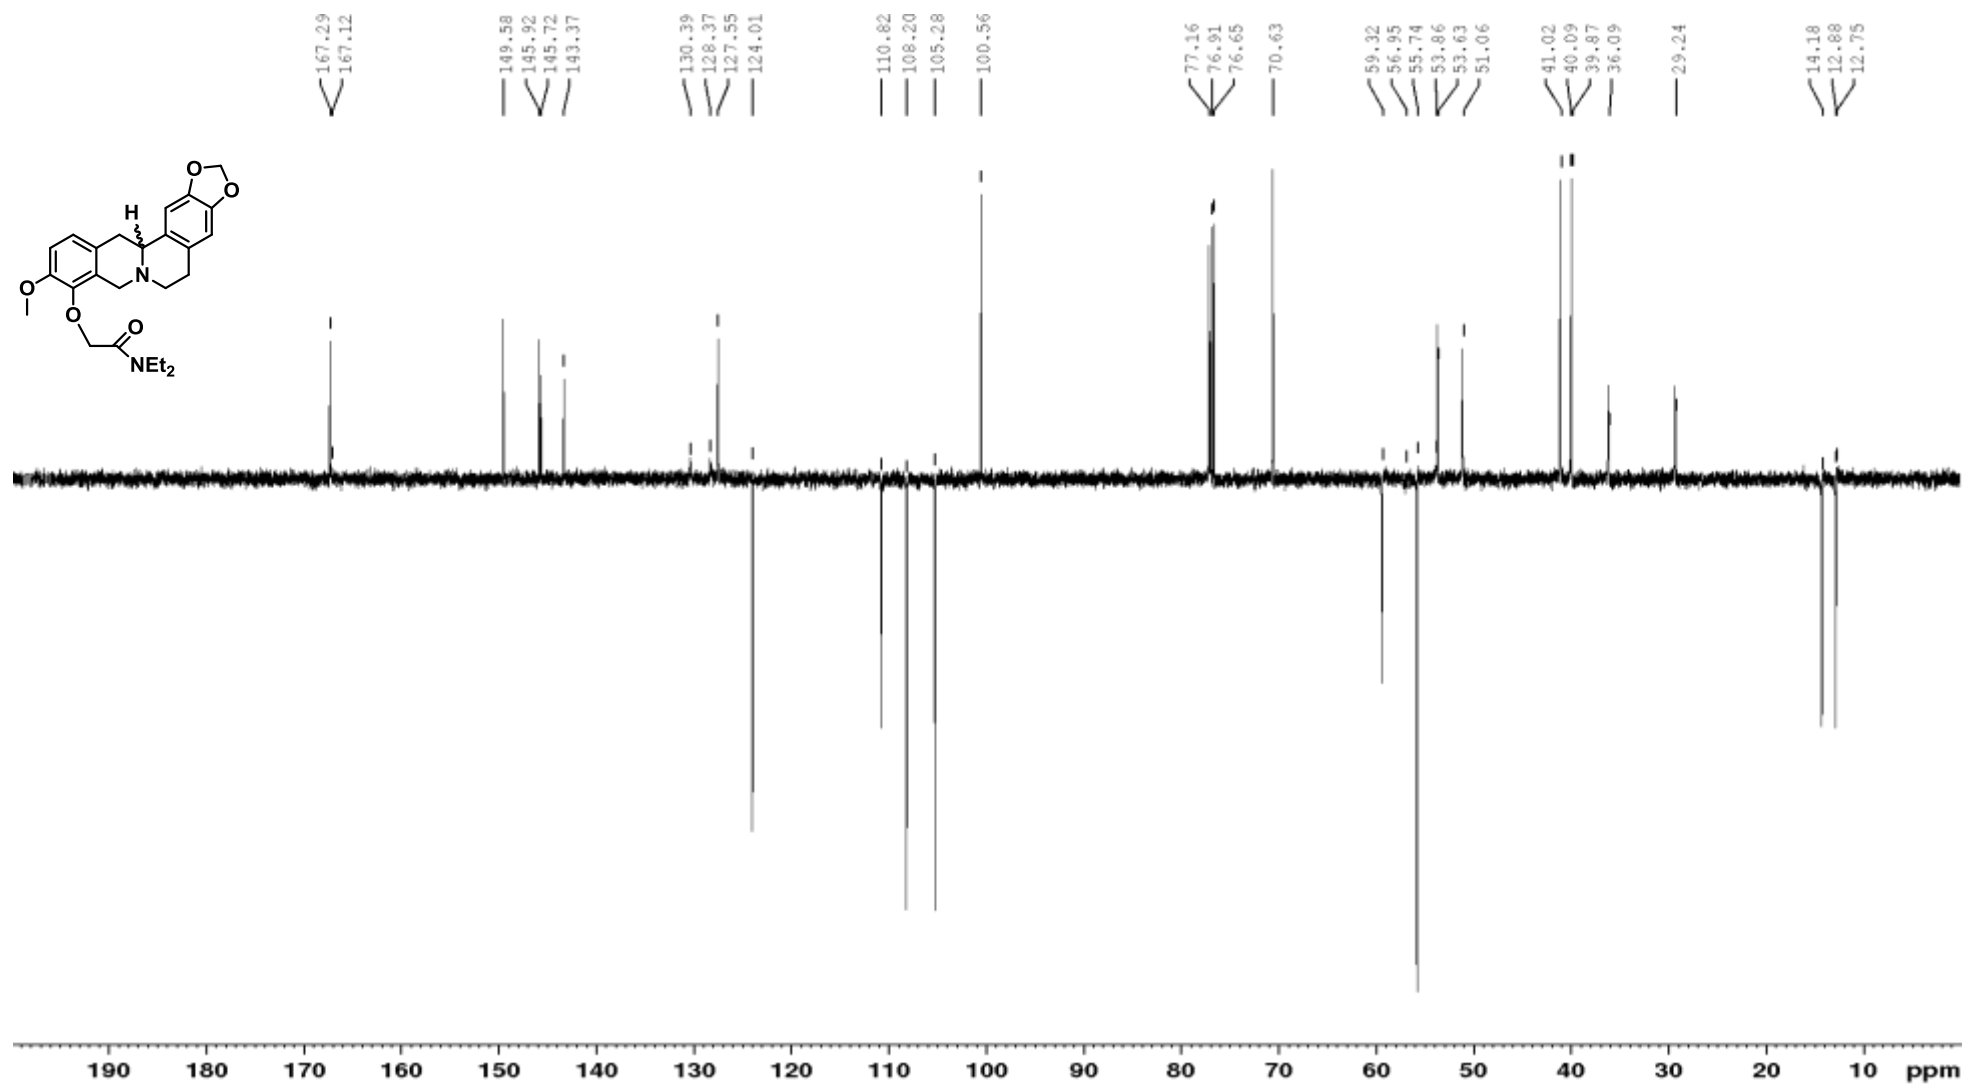

**Fig. S5.** Spectrum of Compound **3b**,  $^1\text{H}$ - $^1\text{H}$  NMR, COSY

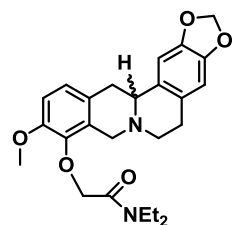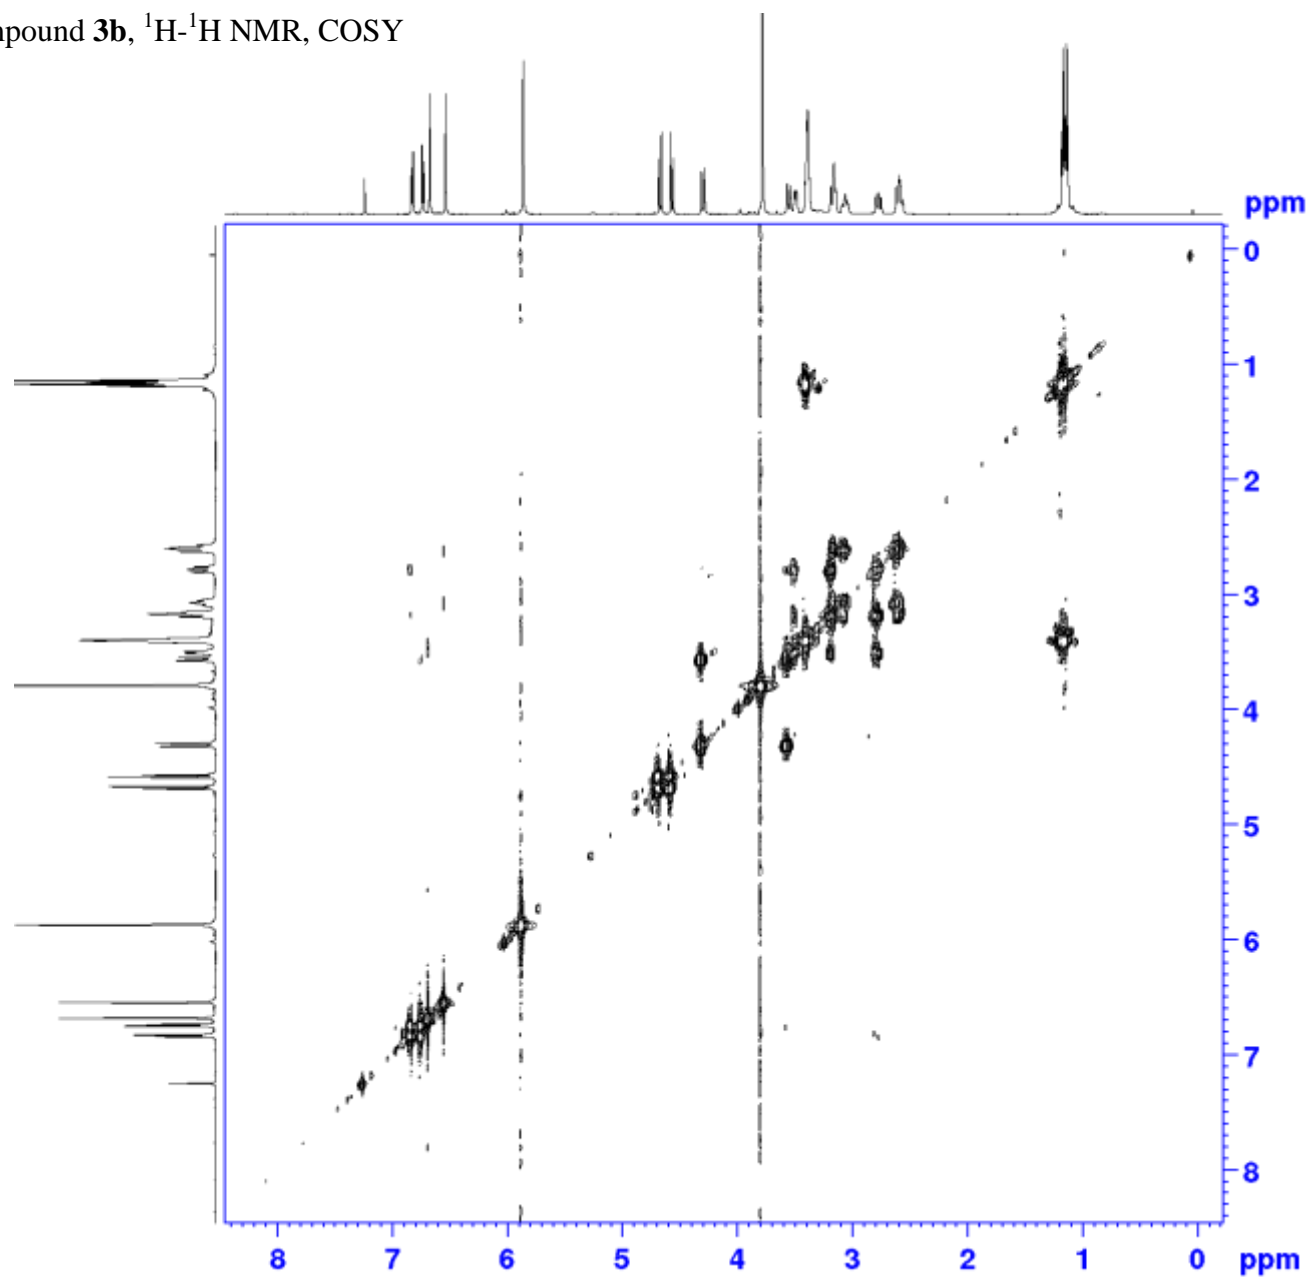

**Fig. S6.** Spectrum of Compound **3b**,  $^1\text{H}$ - $^1\text{H}$  NMR, NOESY

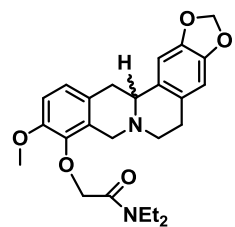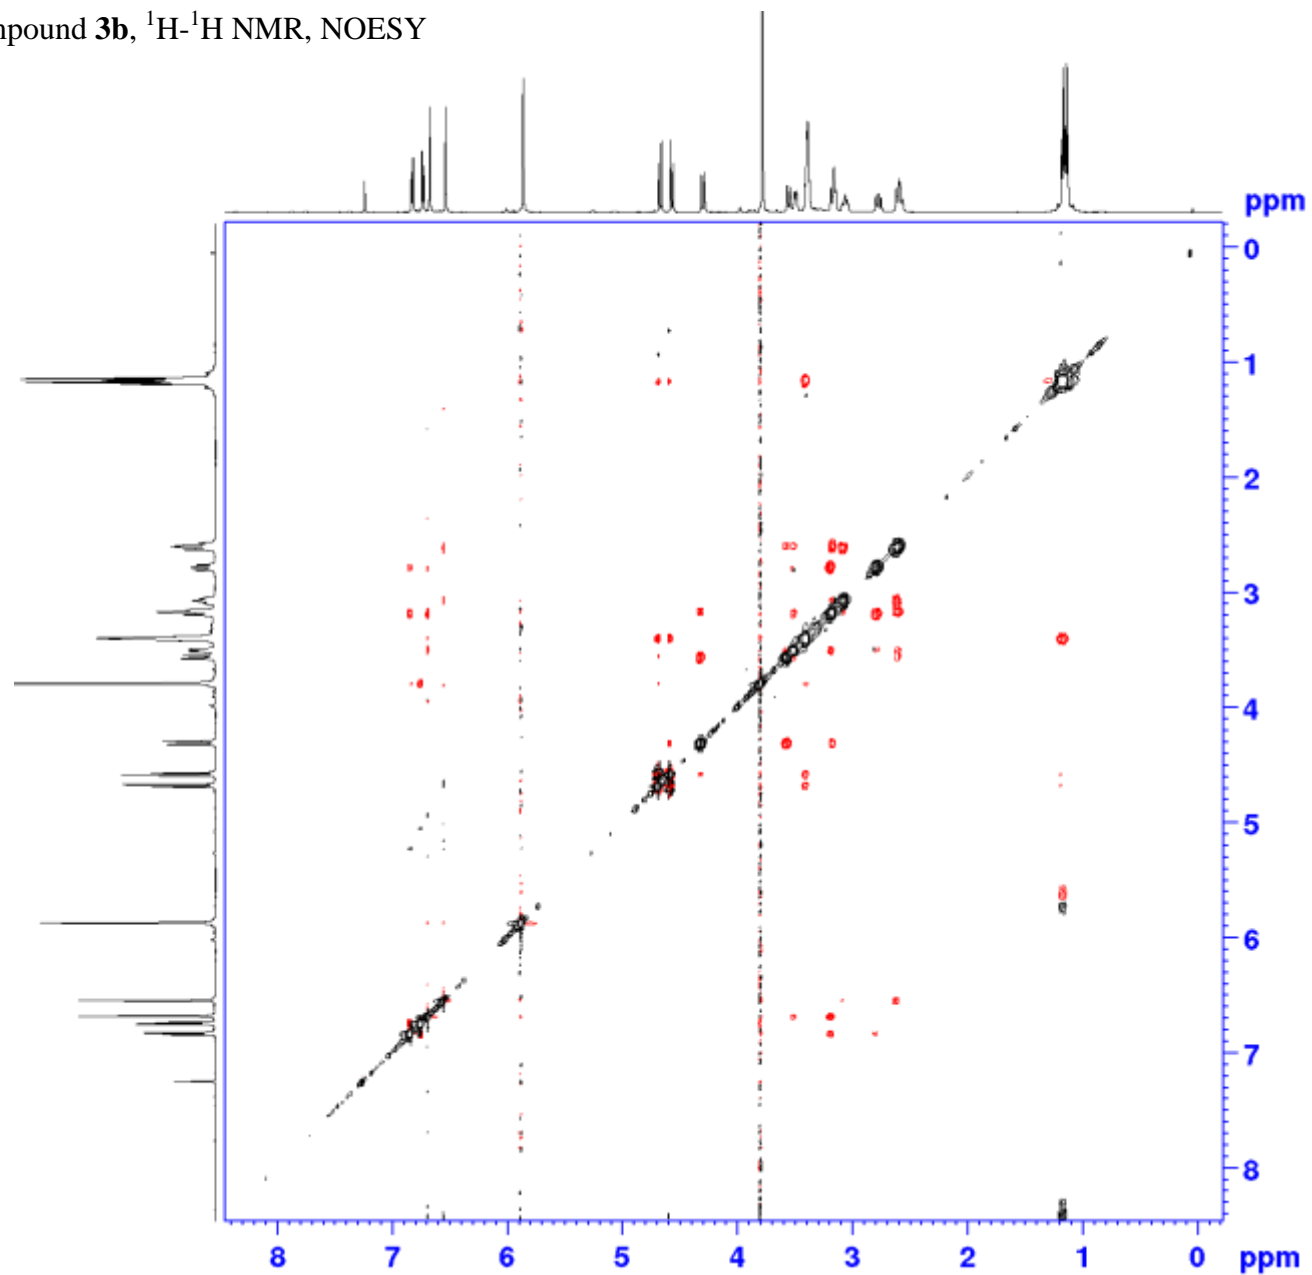

**Fig. S7.** Spectrum of Compound **3b**,  $^1\text{H}$ - $^{13}\text{C}$  NMR, HSQC

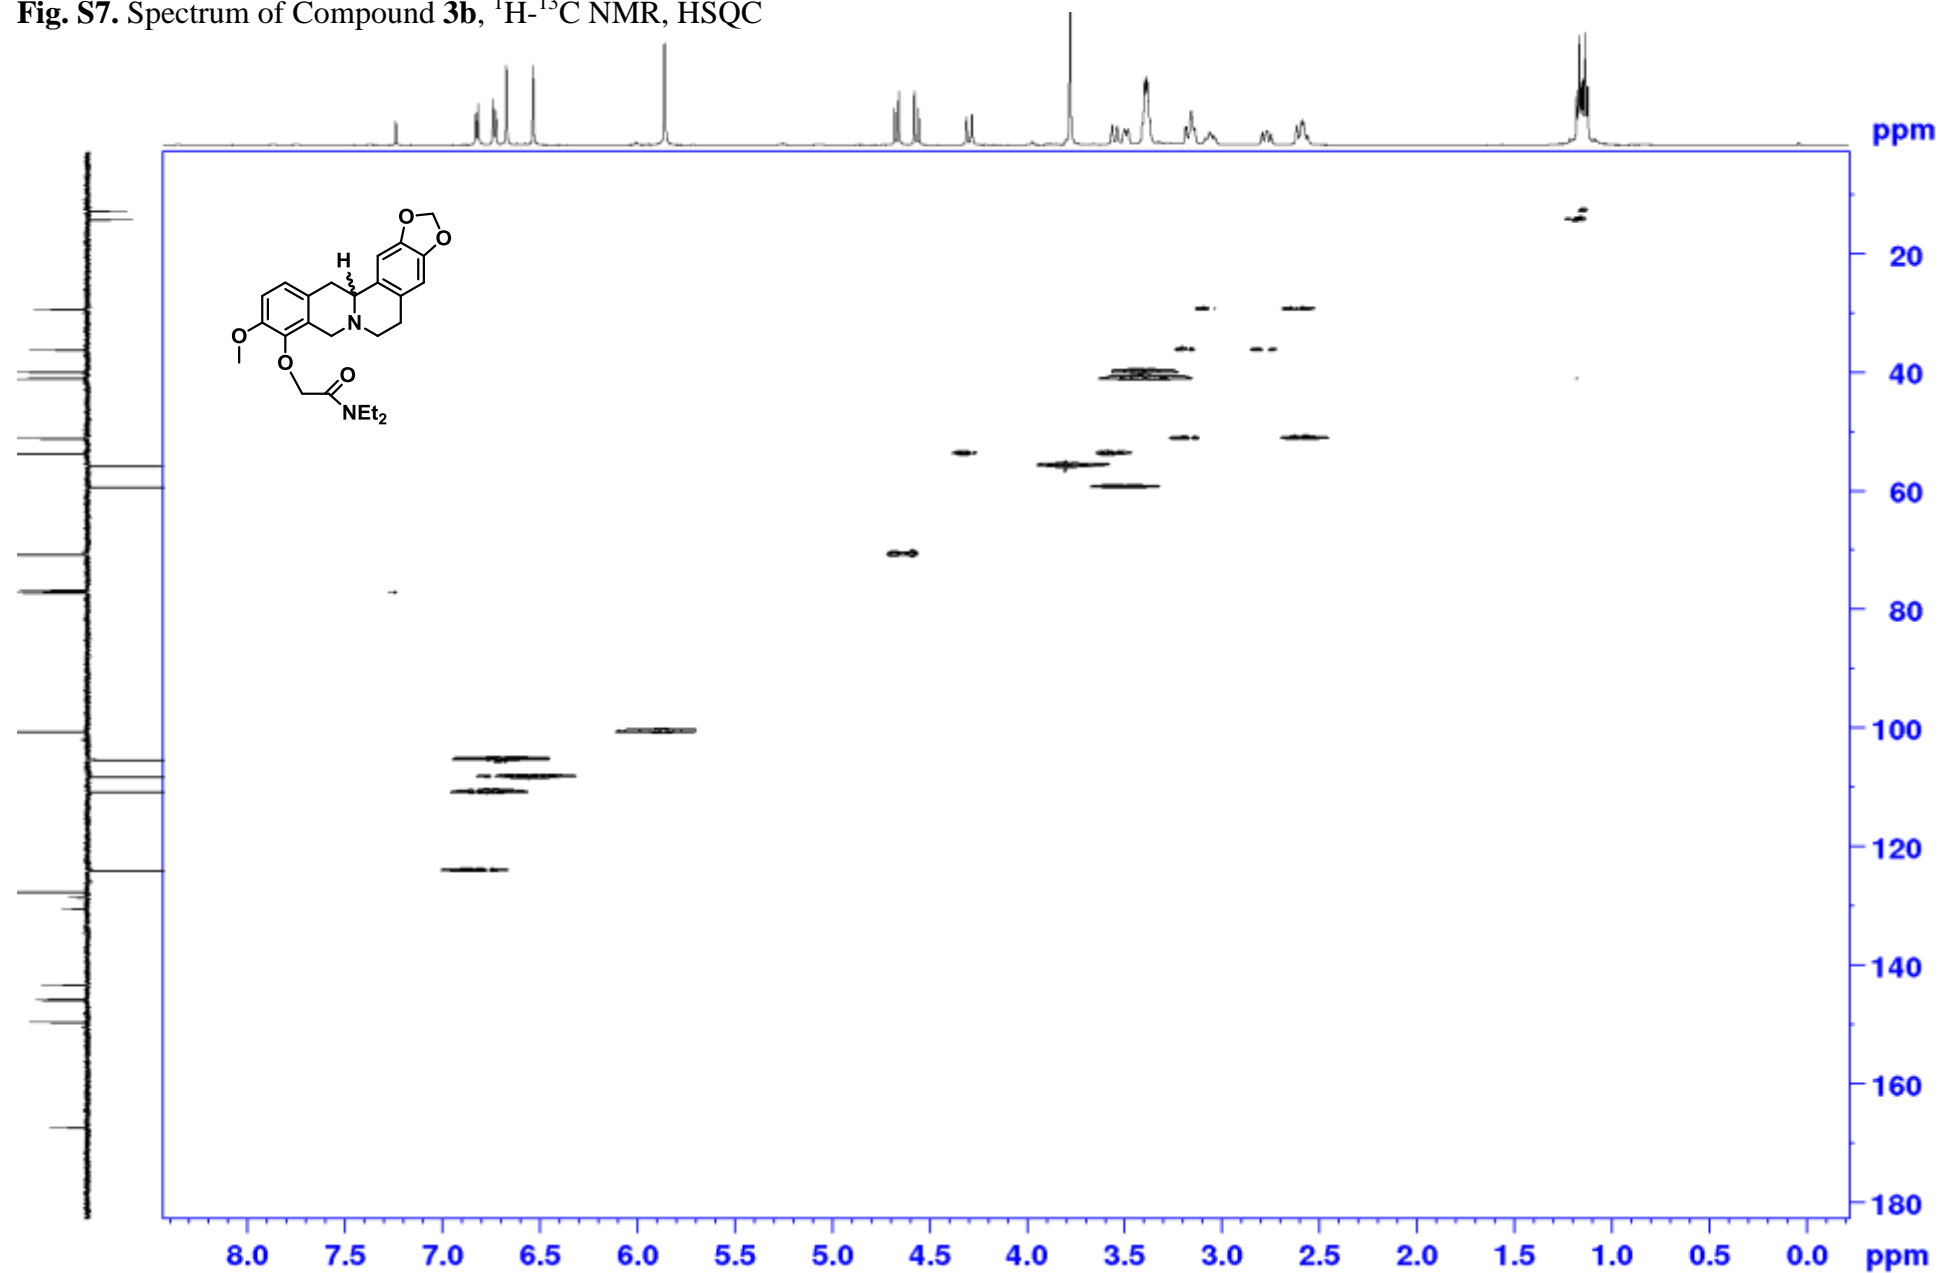



**Fig. S8.** Spectrum of Compound **3b**,  $^1\text{H}$ - $^{13}\text{C}$  NMR, HMBC

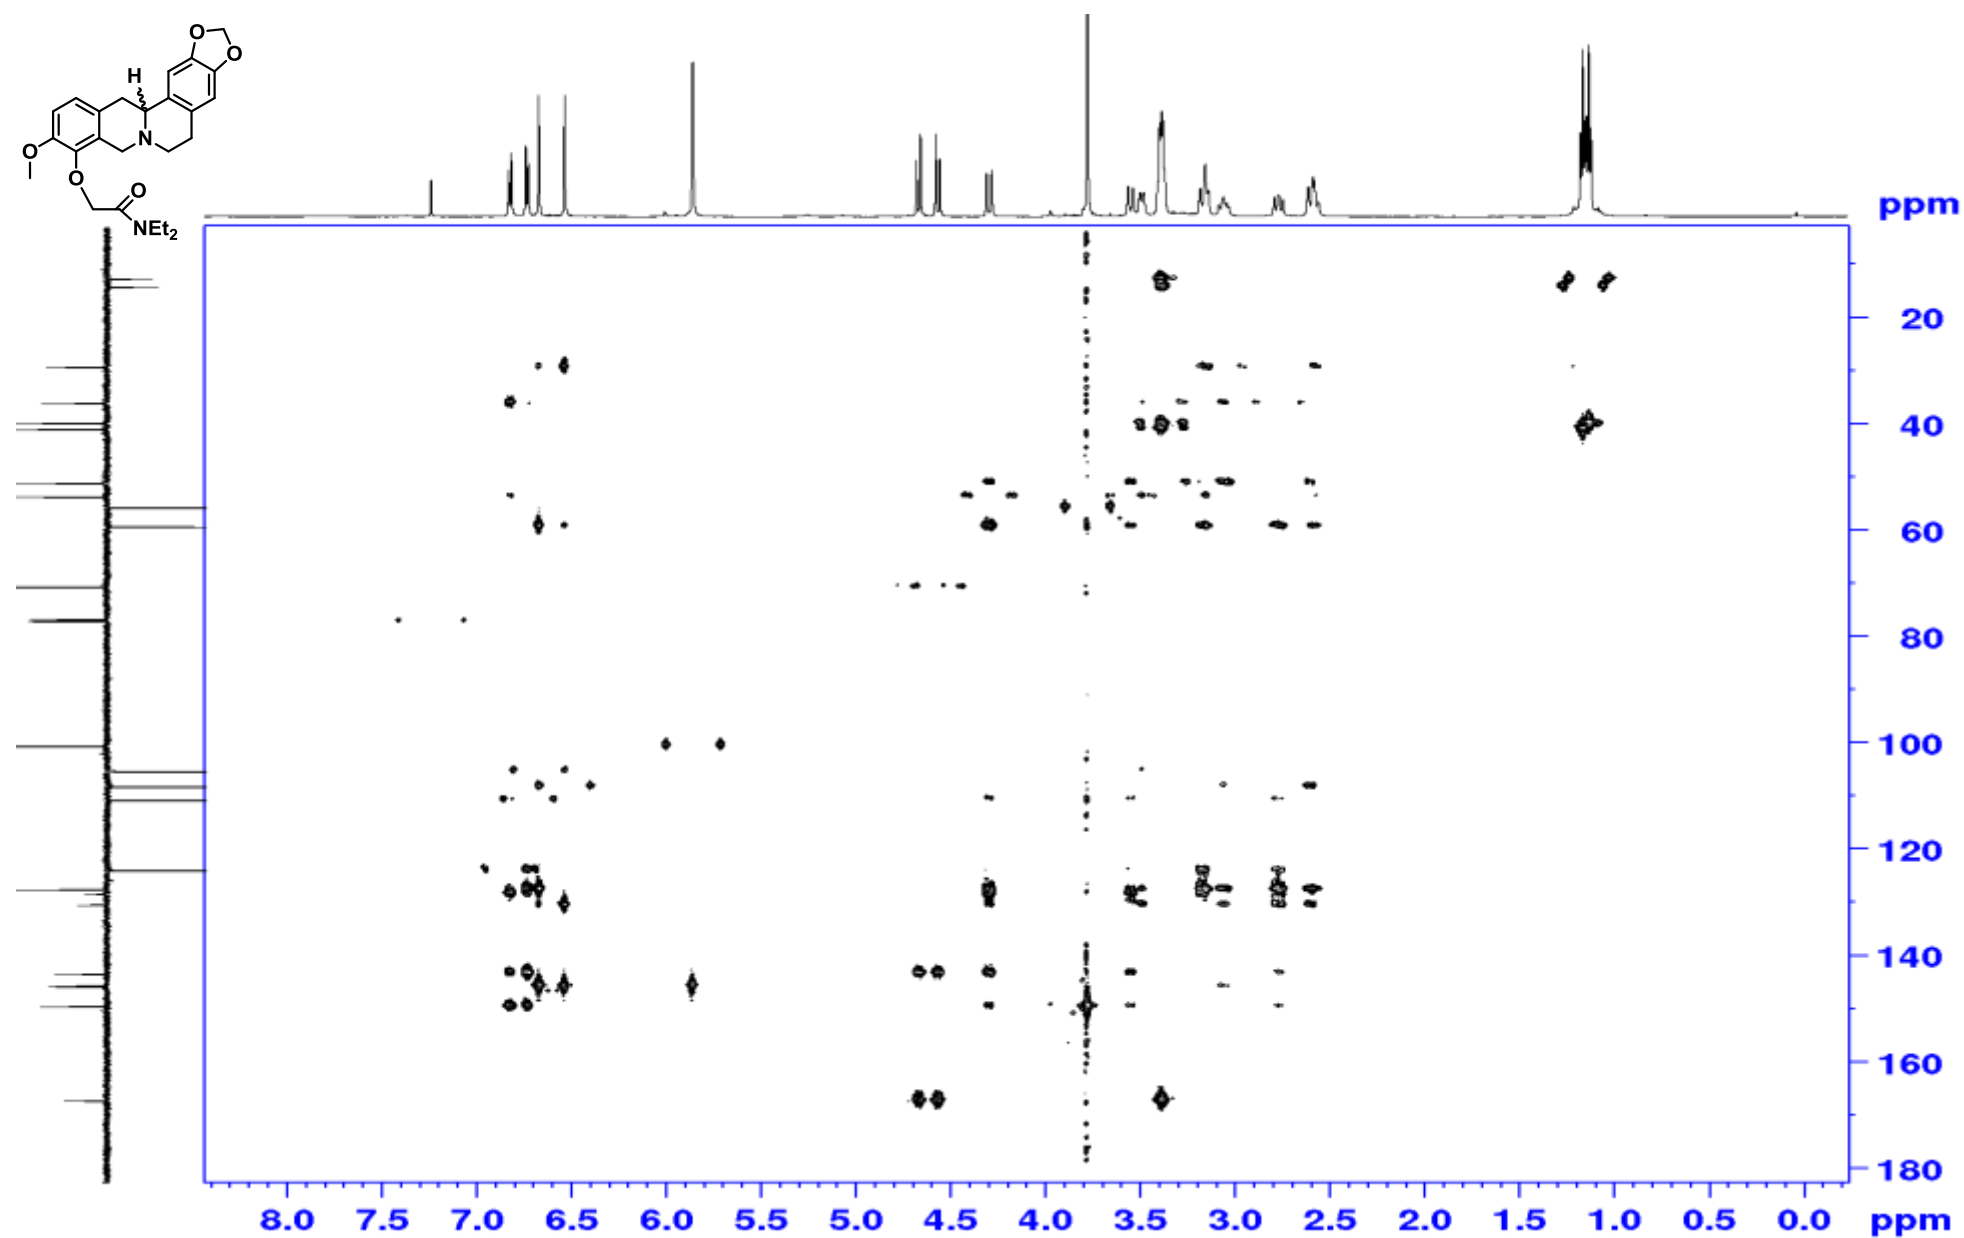

**Fig. S9.** Spectrum of Compound **3c**,  $^1\text{H}$  NMR (400 MHz,  $\text{CDCl}_3$ )

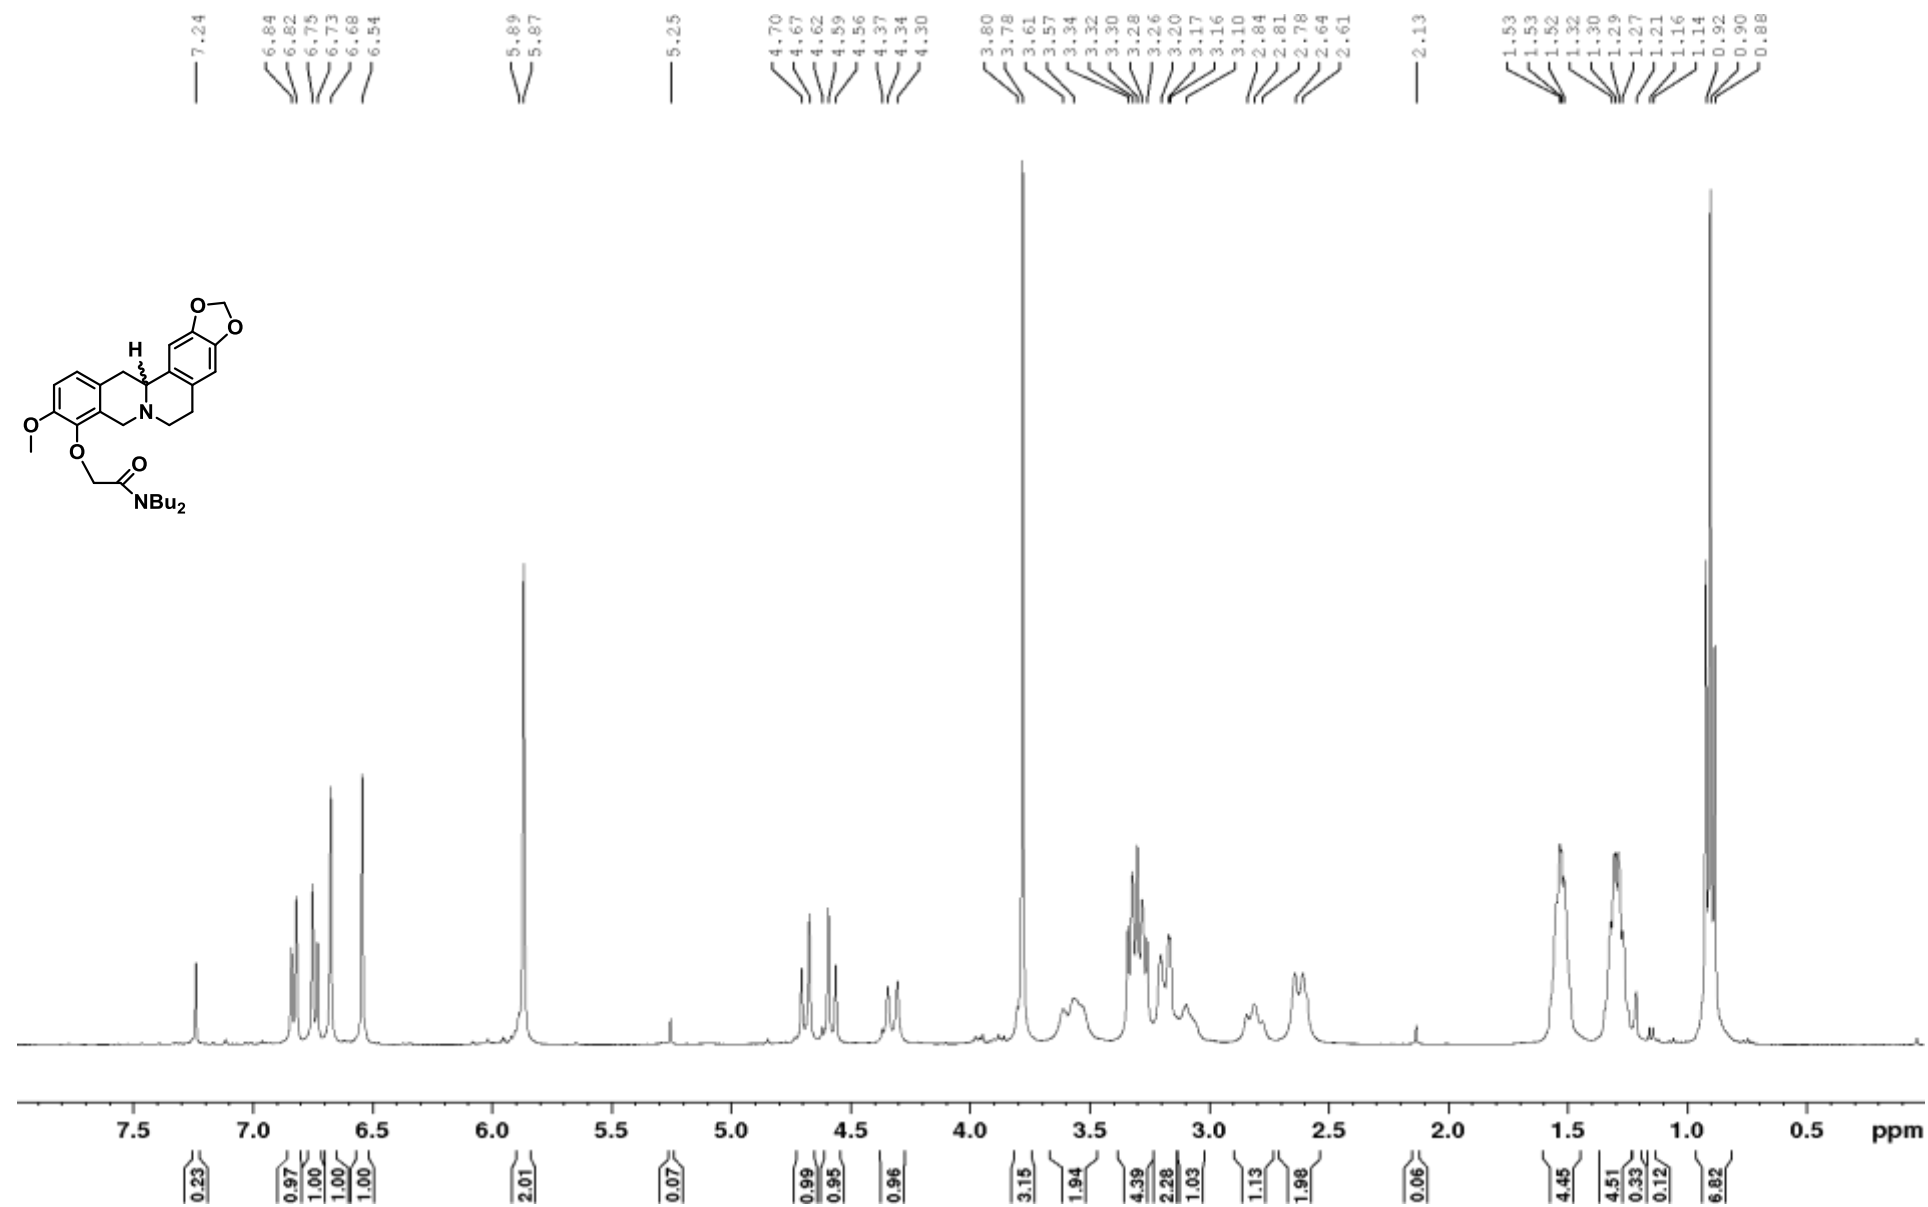

**Fig. S10.** Spectrum of Compound **3c**,  $^{13}\text{C}$  NMR (100 MHz,  $\text{CDCl}_3$ )

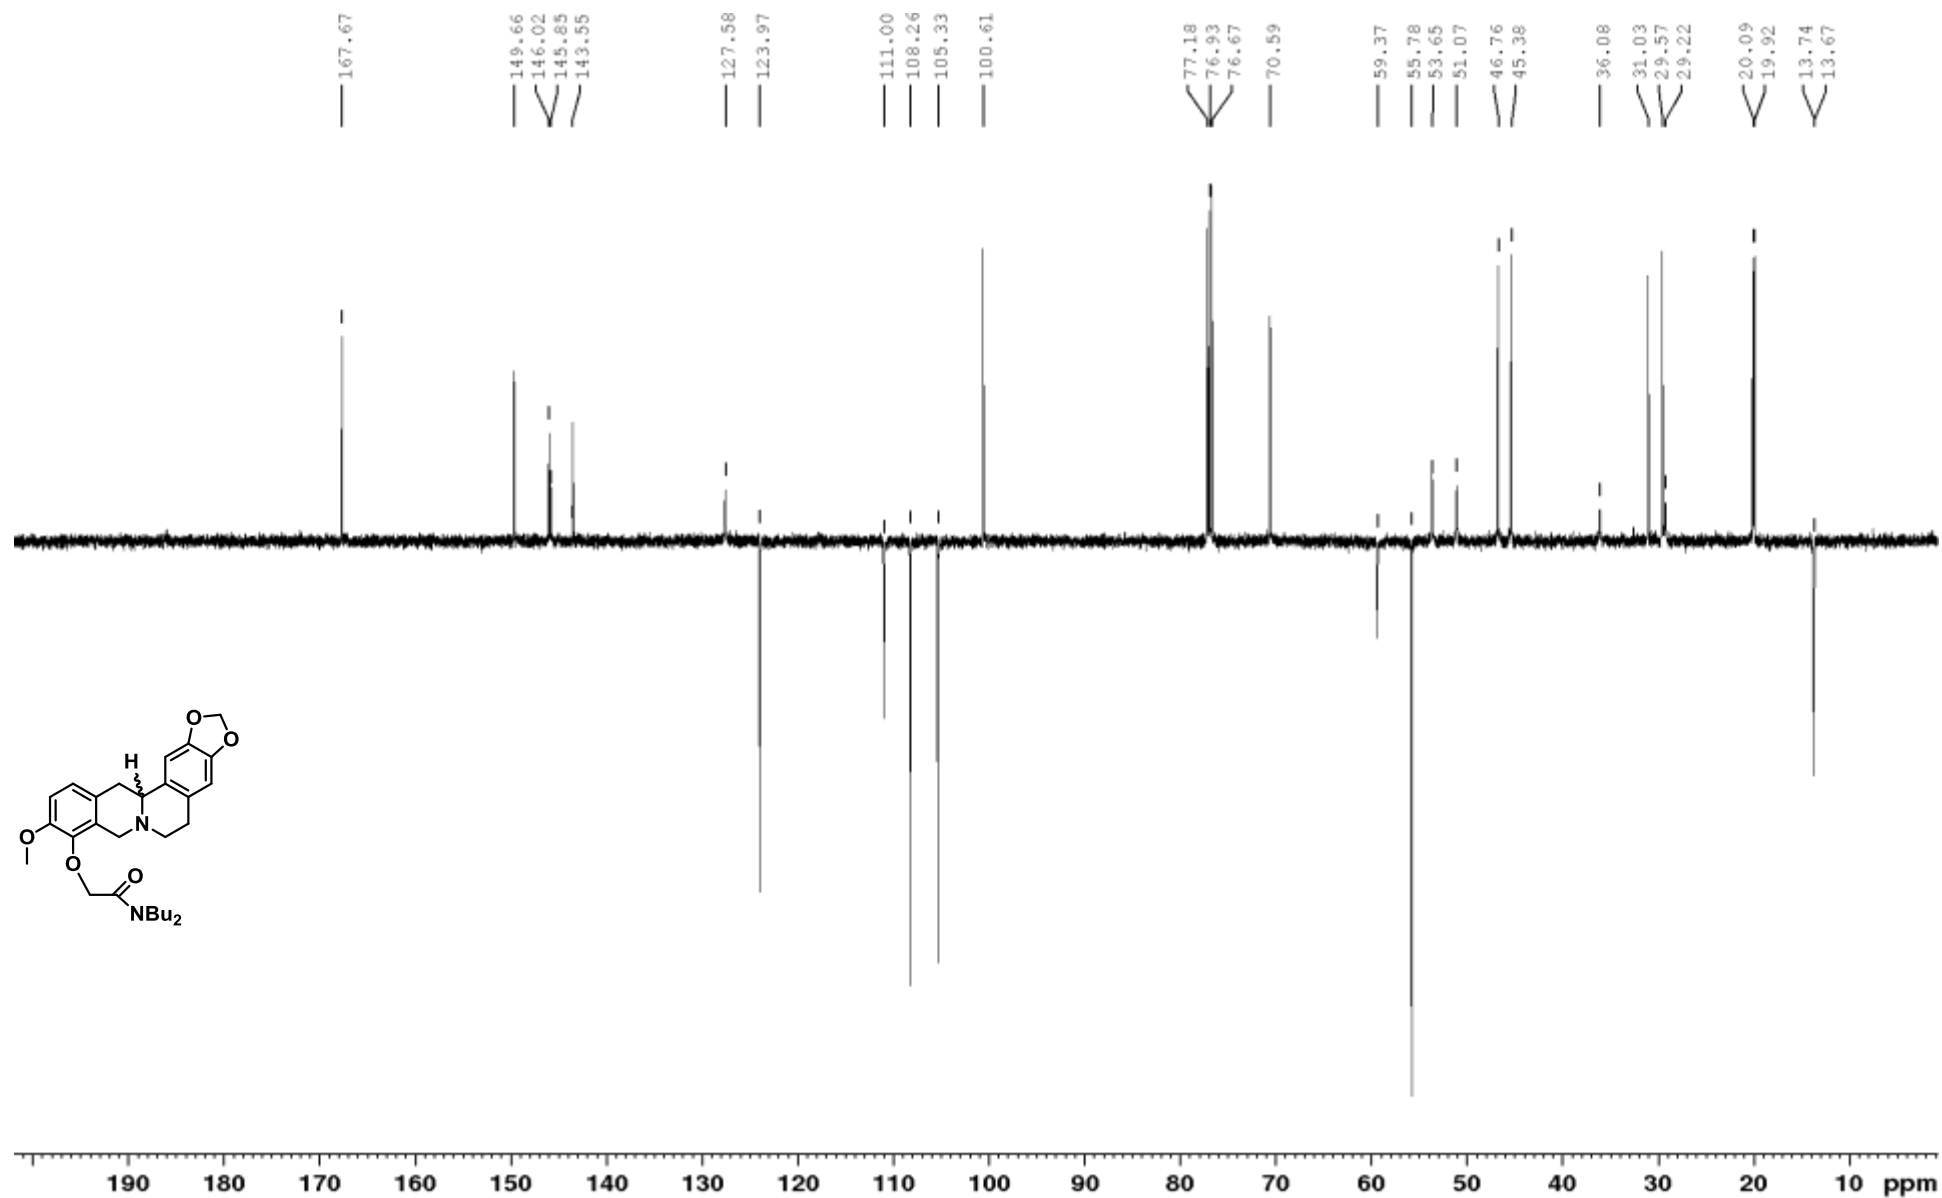

**Fig. S11.** Spectrum of Compound **3d**,  $^1\text{H}$  NMR (400 MHz,  $\text{CDCl}_3$ )

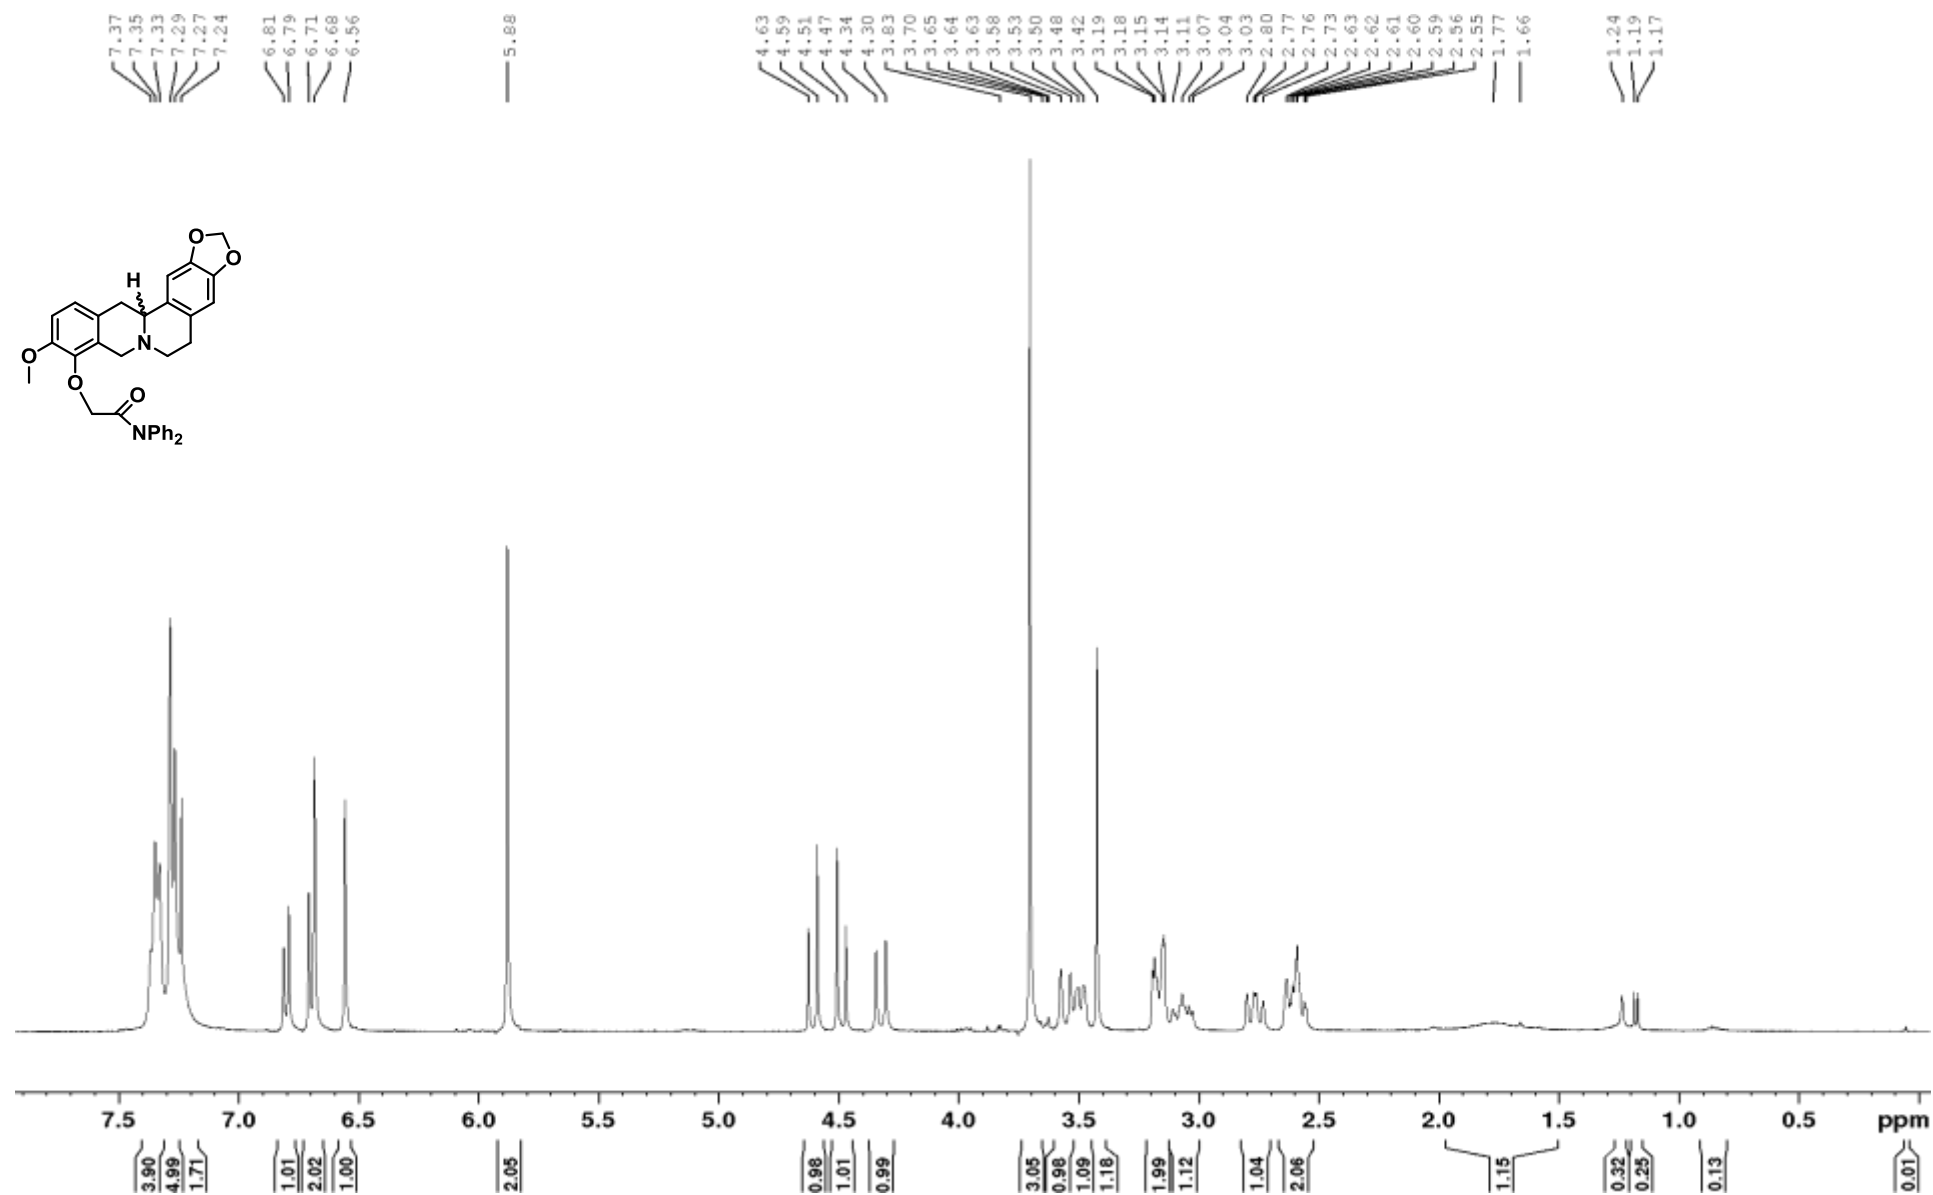

**Fig. S12.** Spectrum of Compound **3d**,  $^{13}\text{C}$  NMR (100 MHz,  $\text{CDCl}_3$ )

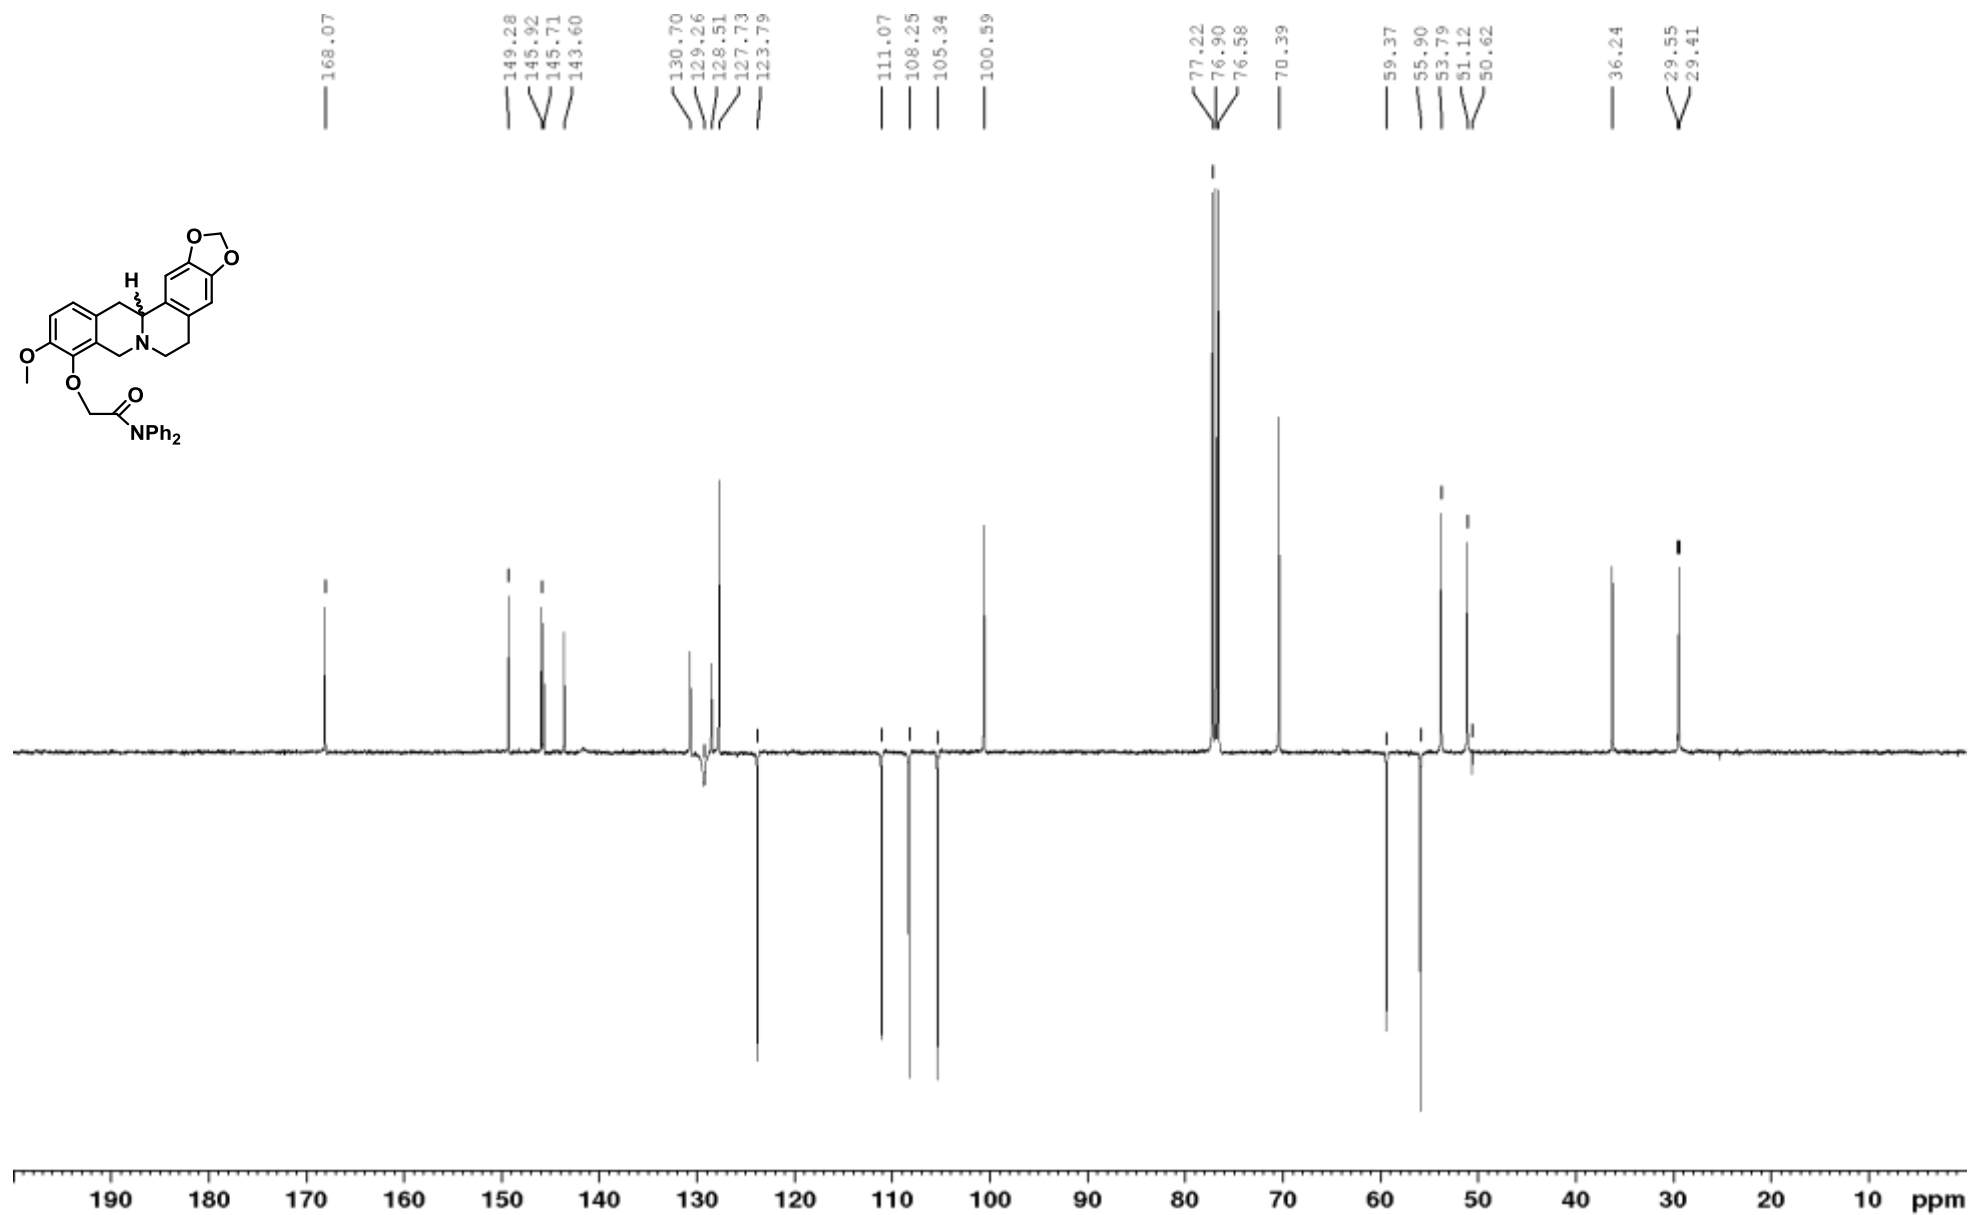

**Fig. S13.** Spectrum of Compound **3e**,  $^1\text{H}$  NMR (400 MHz, DMSO- $d_6$ )

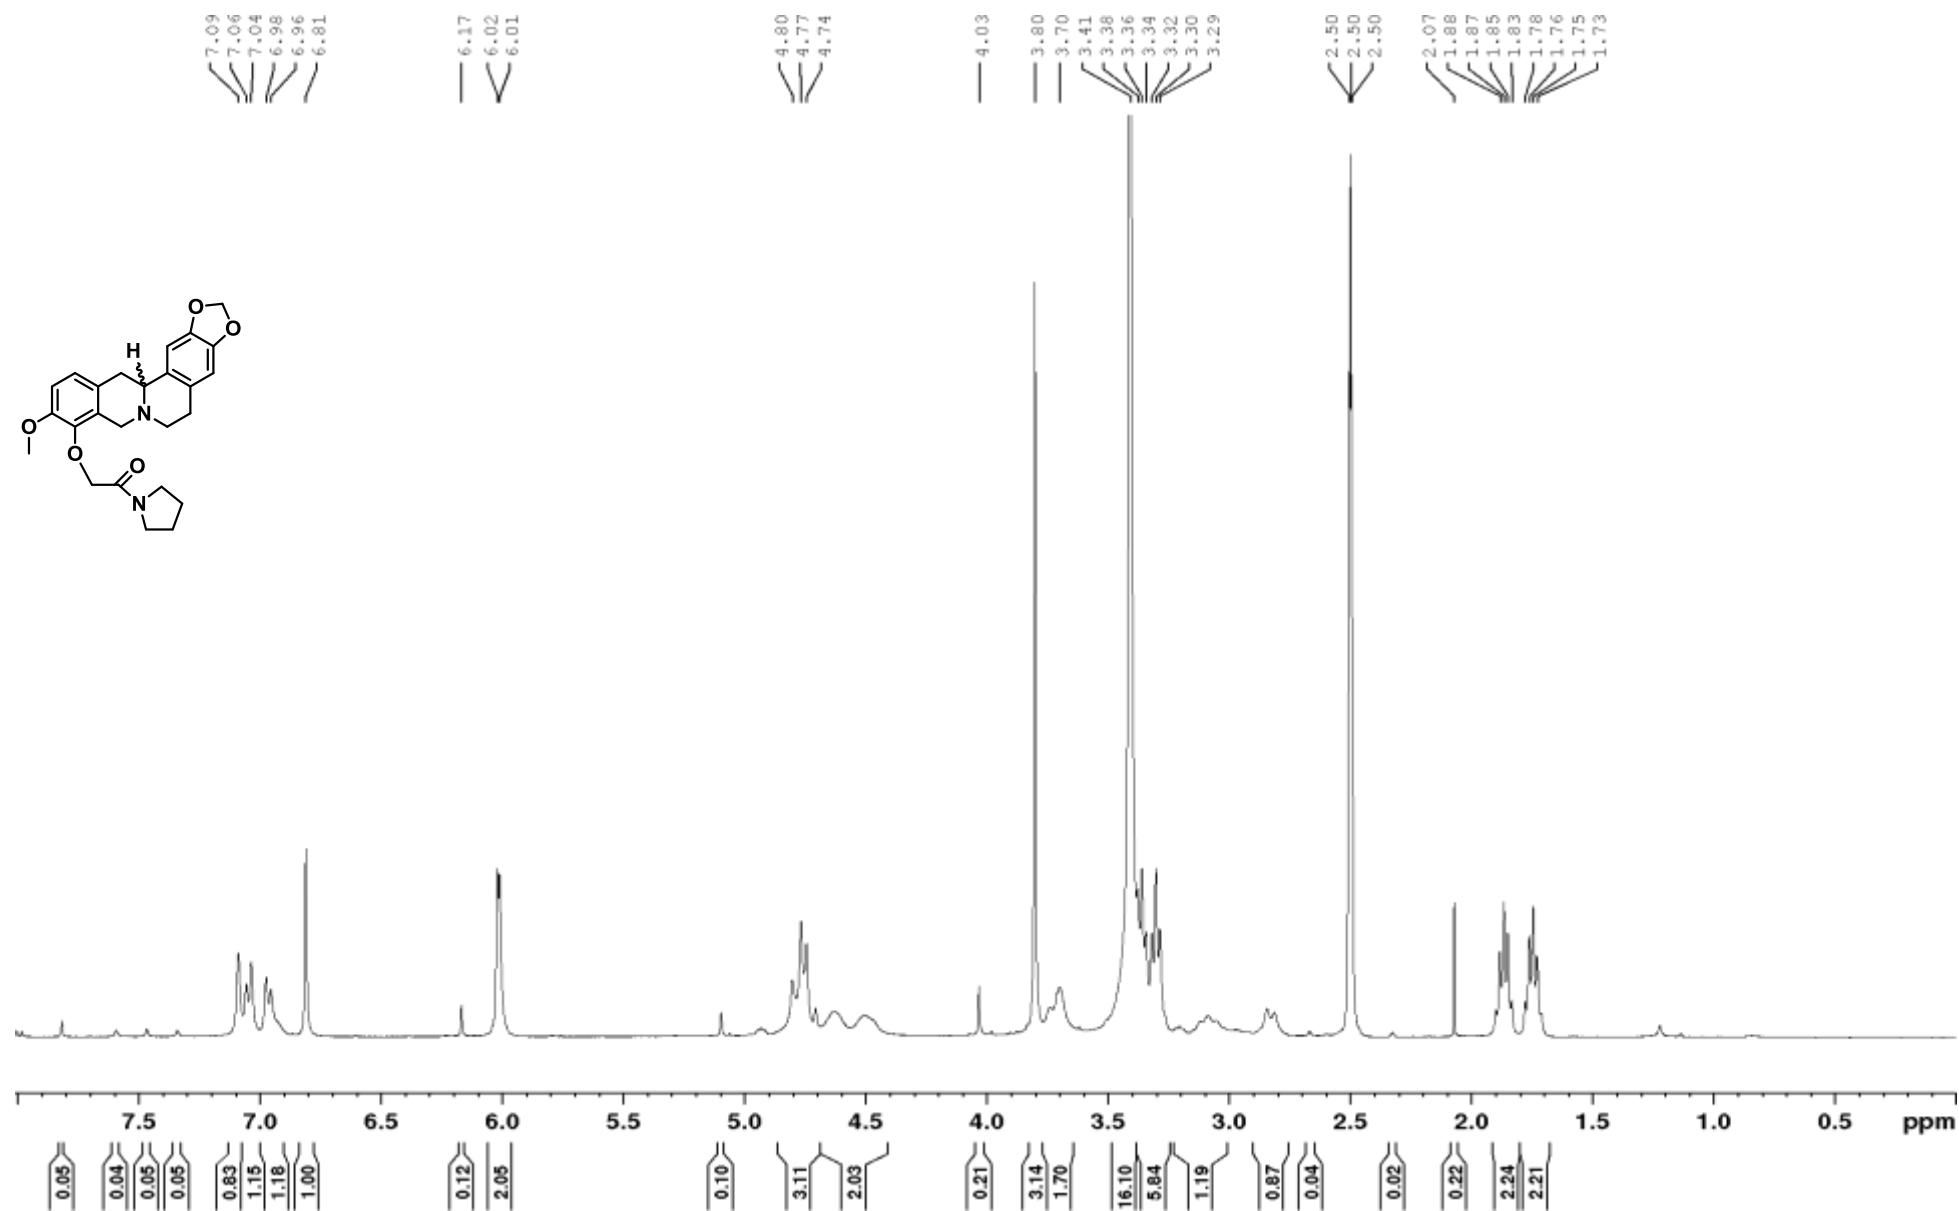

**Fig. S14.** Spectrum of Compound **3e**,  $^{13}\text{C}$  NMR (100 MHz, DMSO- $d_6$ )

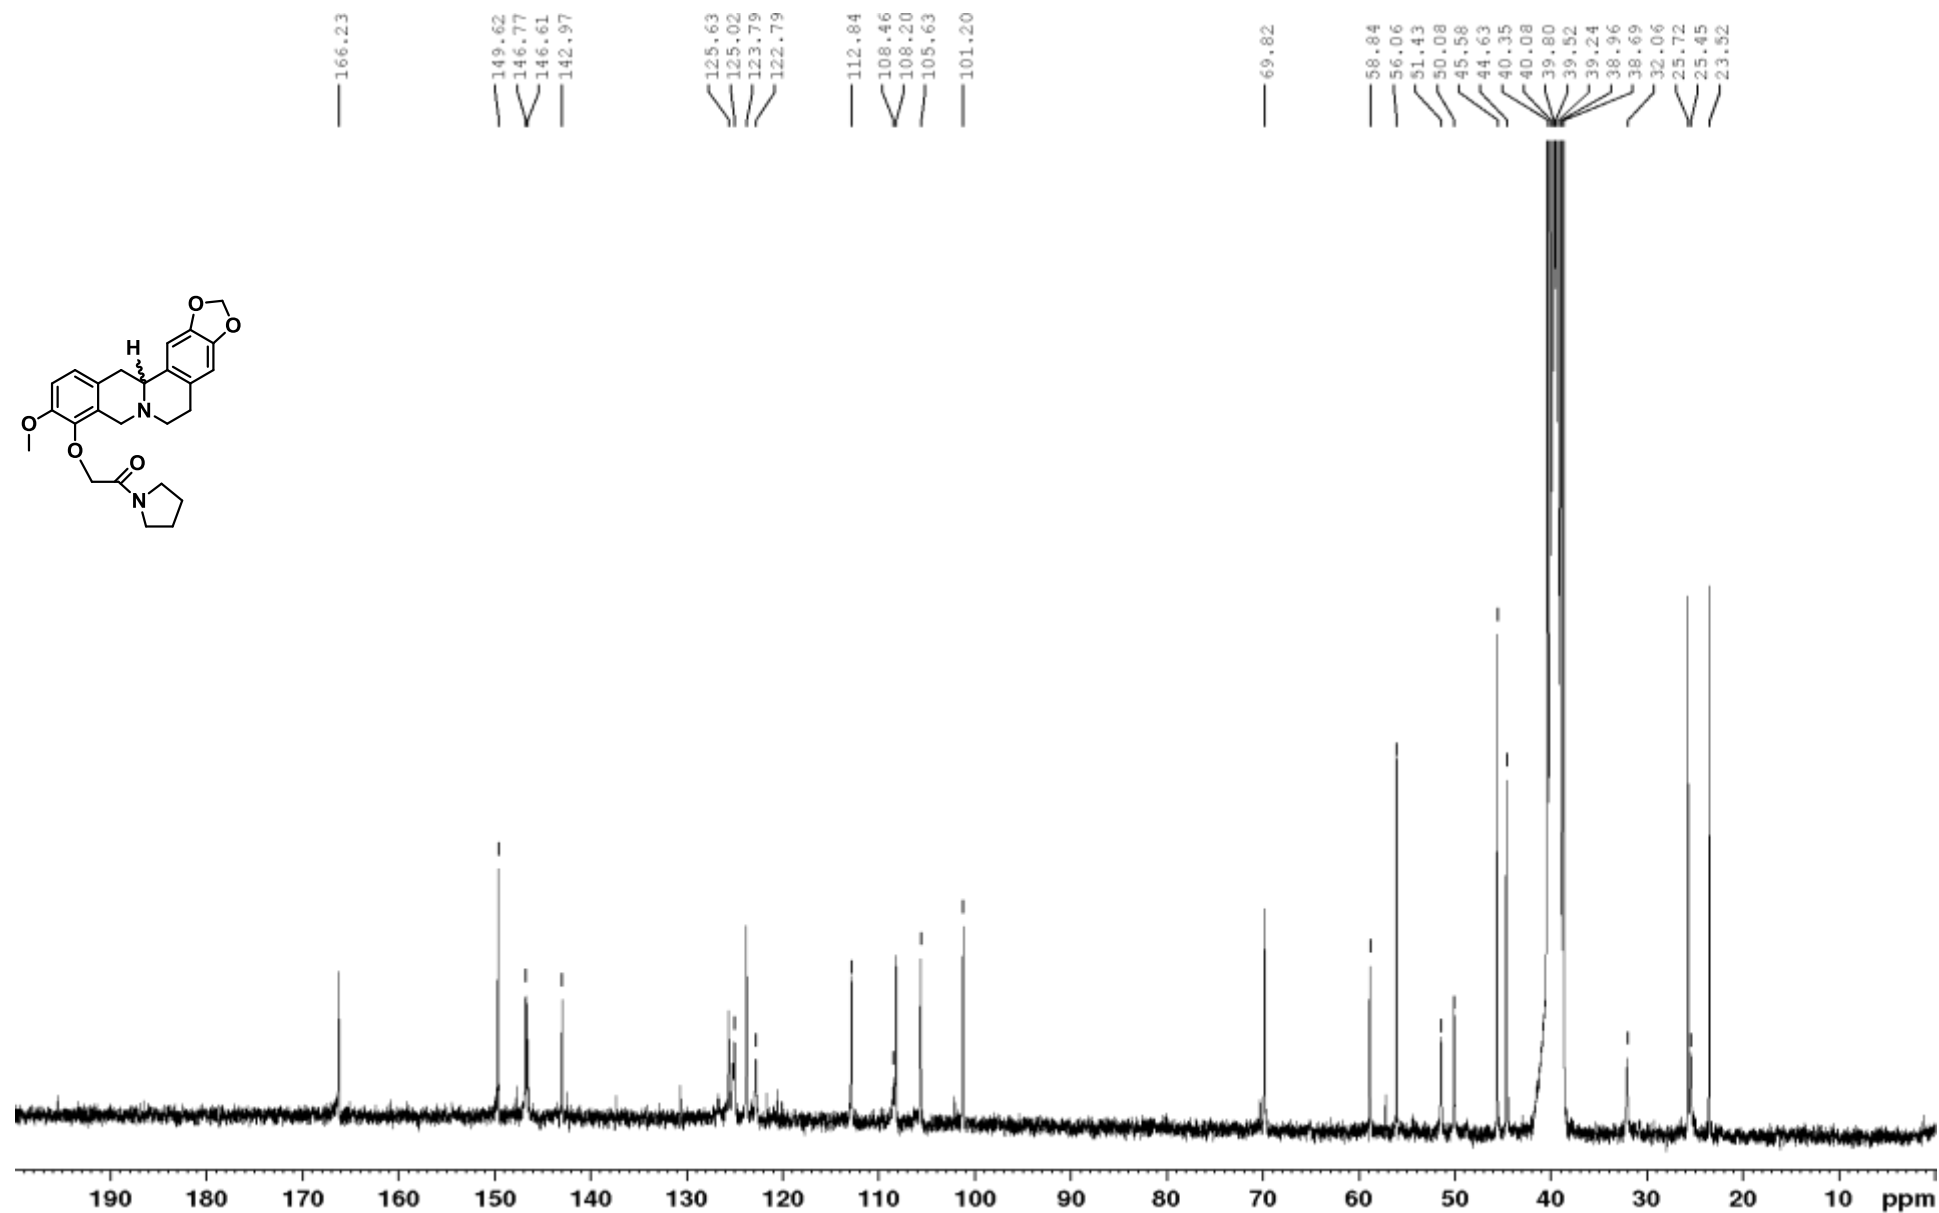

**Fig. S15.** Spectrum of Compound **3f**,  $^1\text{H}$  NMR (400 MHz,  $\text{CDCl}_3$ )

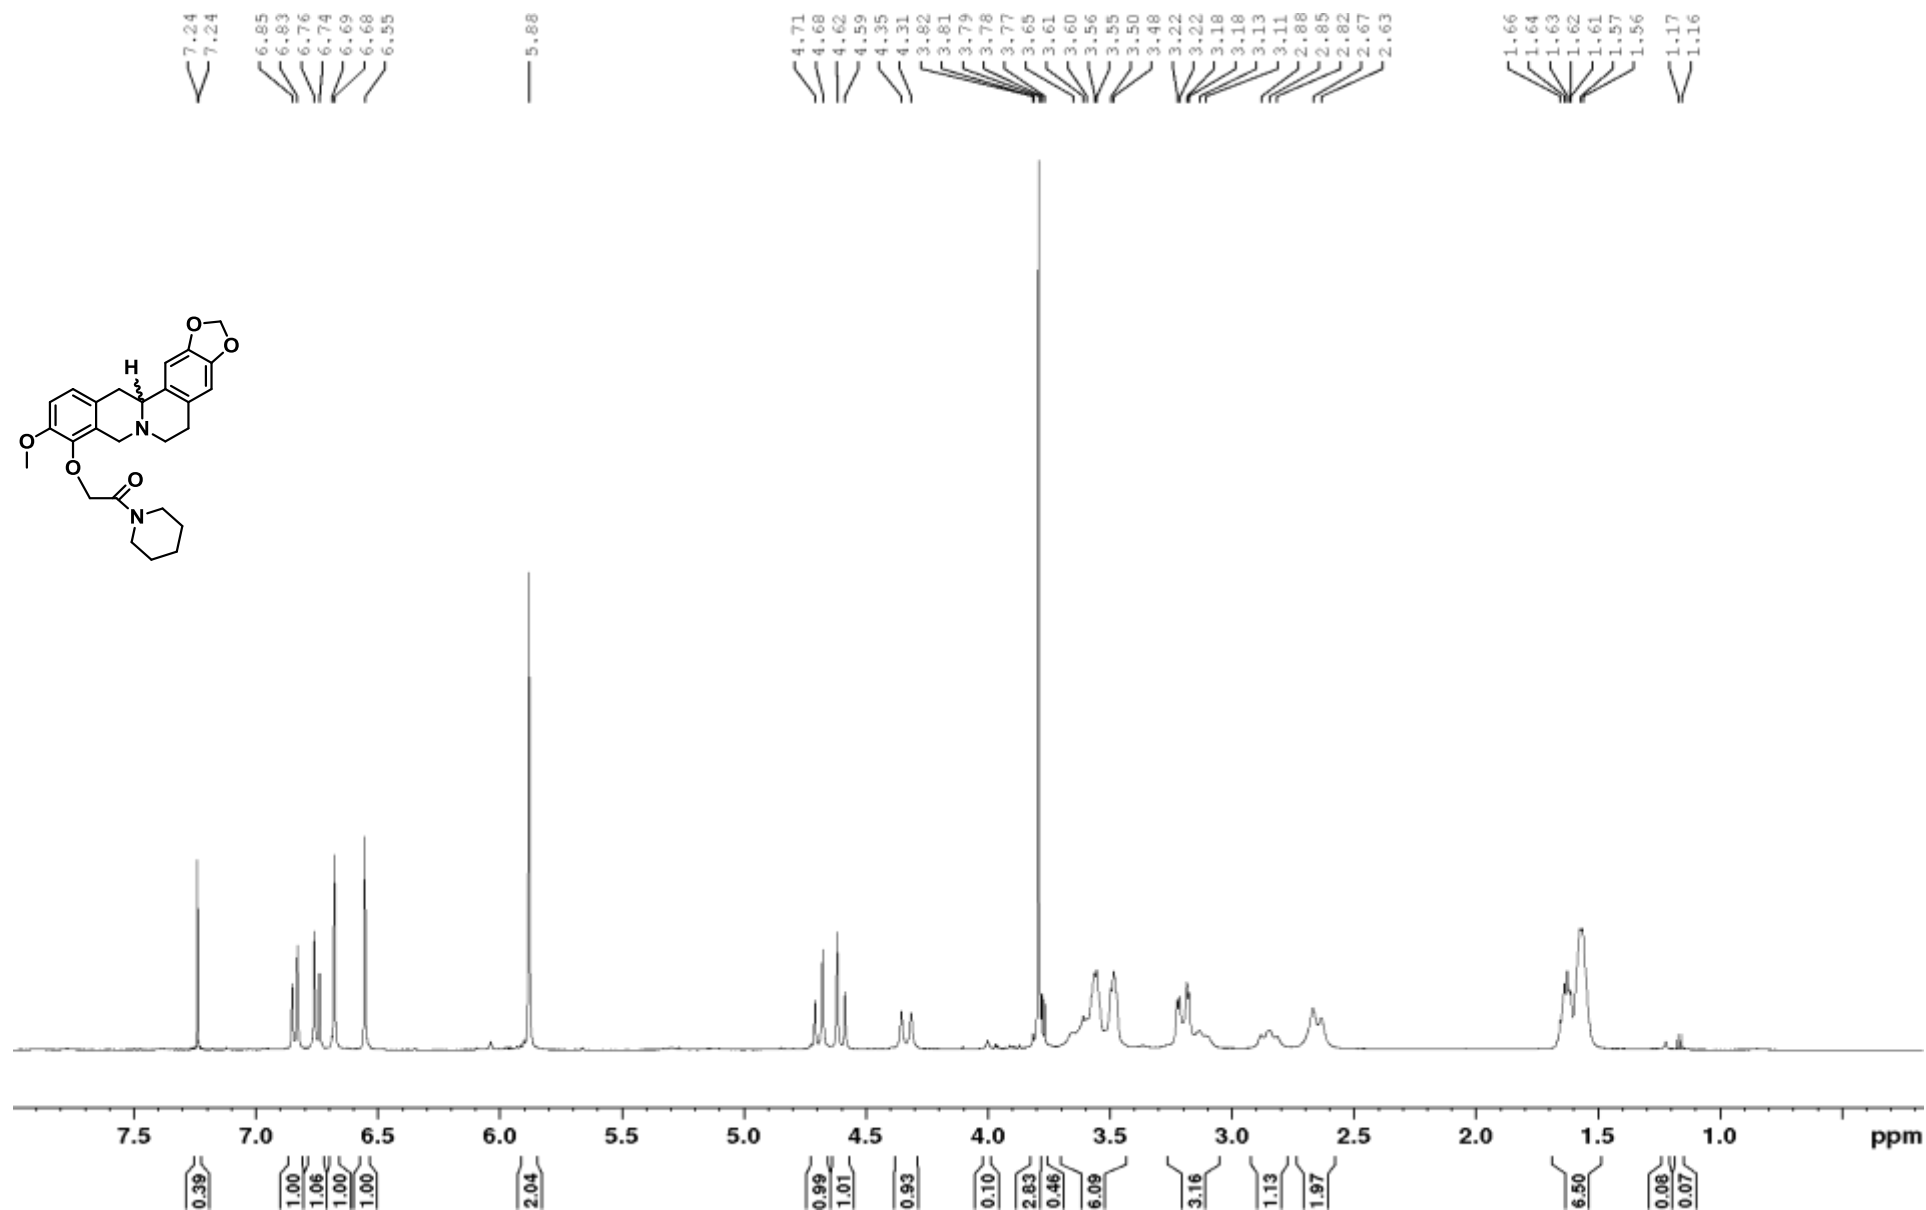



**Fig. S16.** Spectrum of Compound **3f**,  $^{13}\text{C}$  NMR (100 MHz,  $\text{CDCl}_3$ )

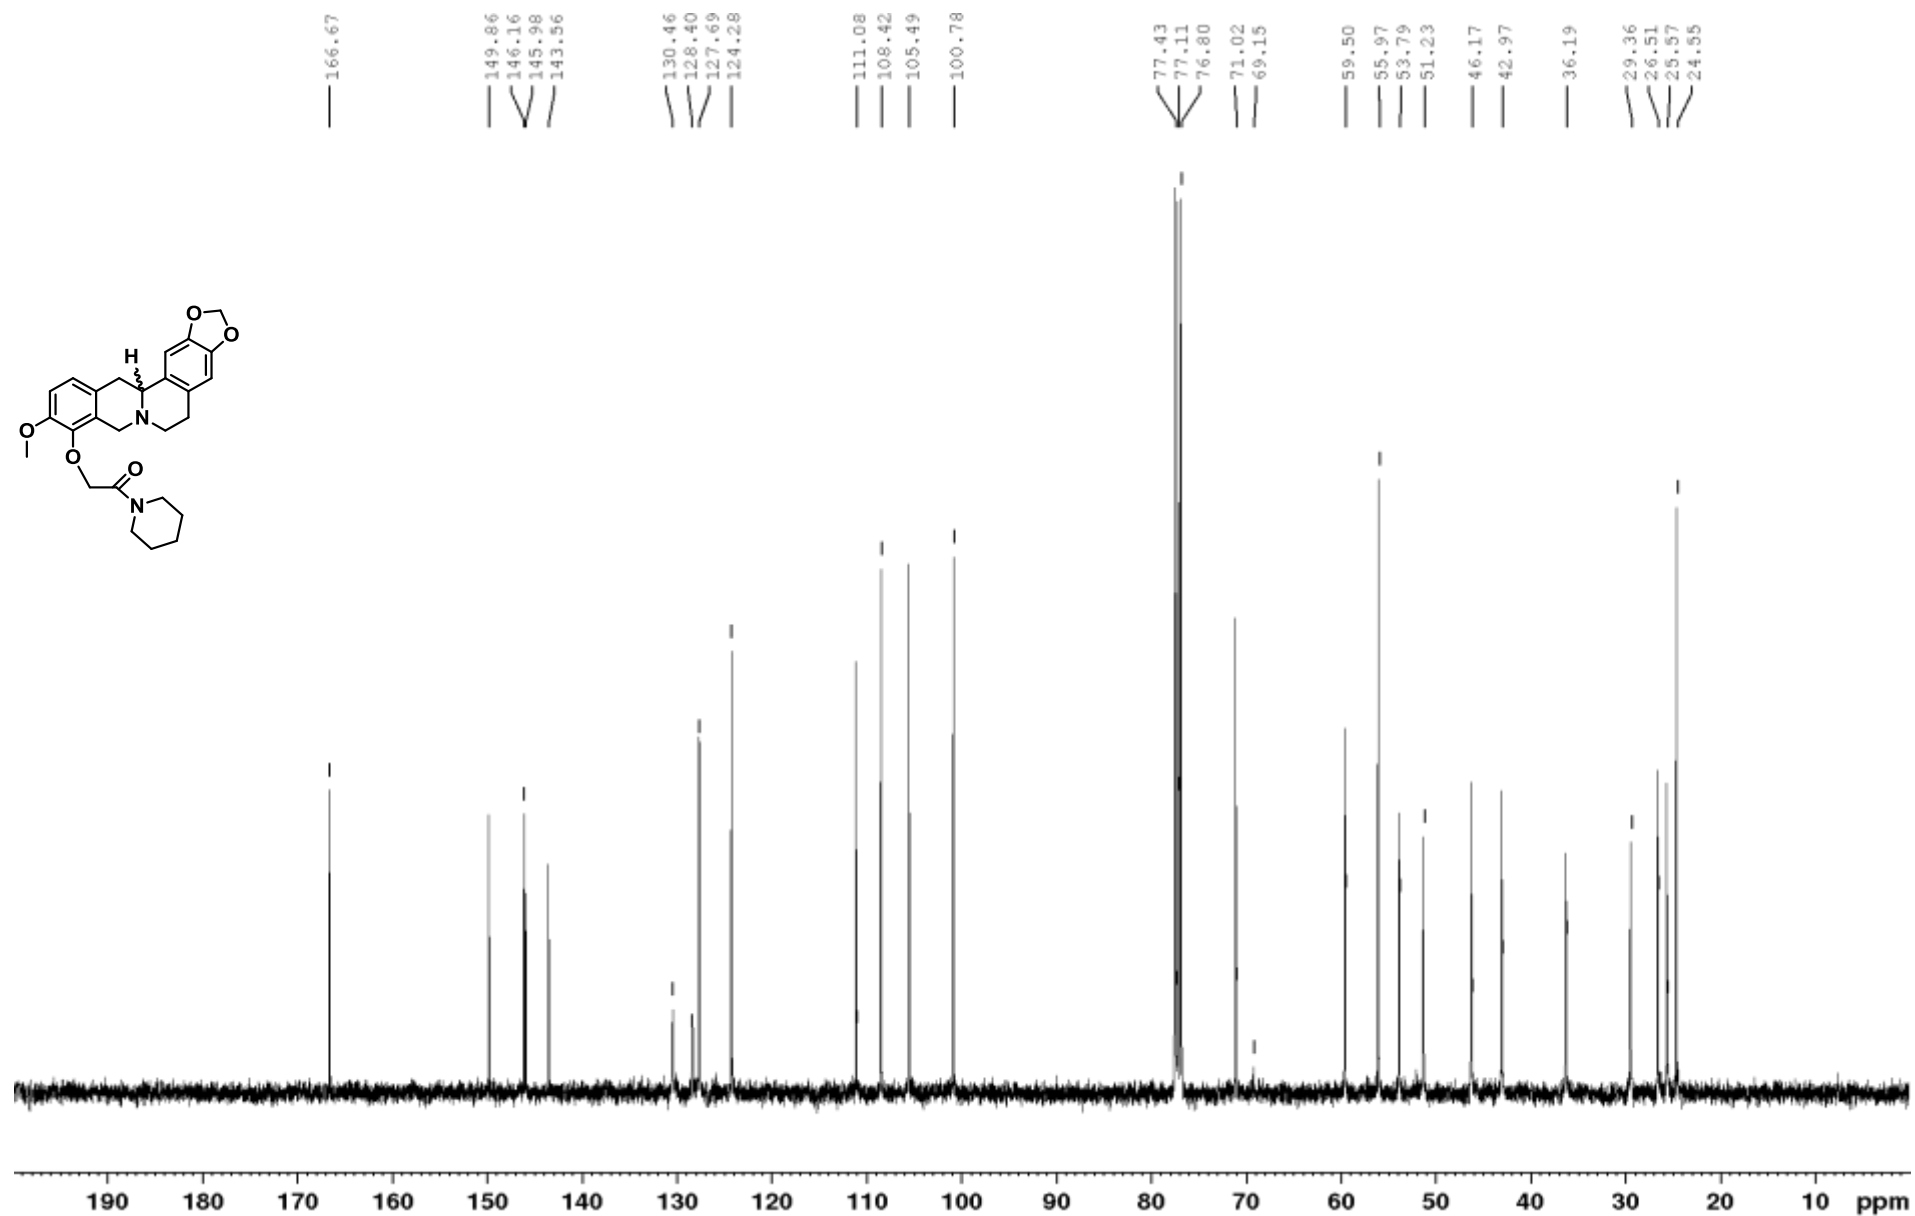

**Fig. S17.** Spectrum of Compound **3g**,  $^1\text{H}$  NMR (400 MHz,  $\text{CDCl}_3$ )

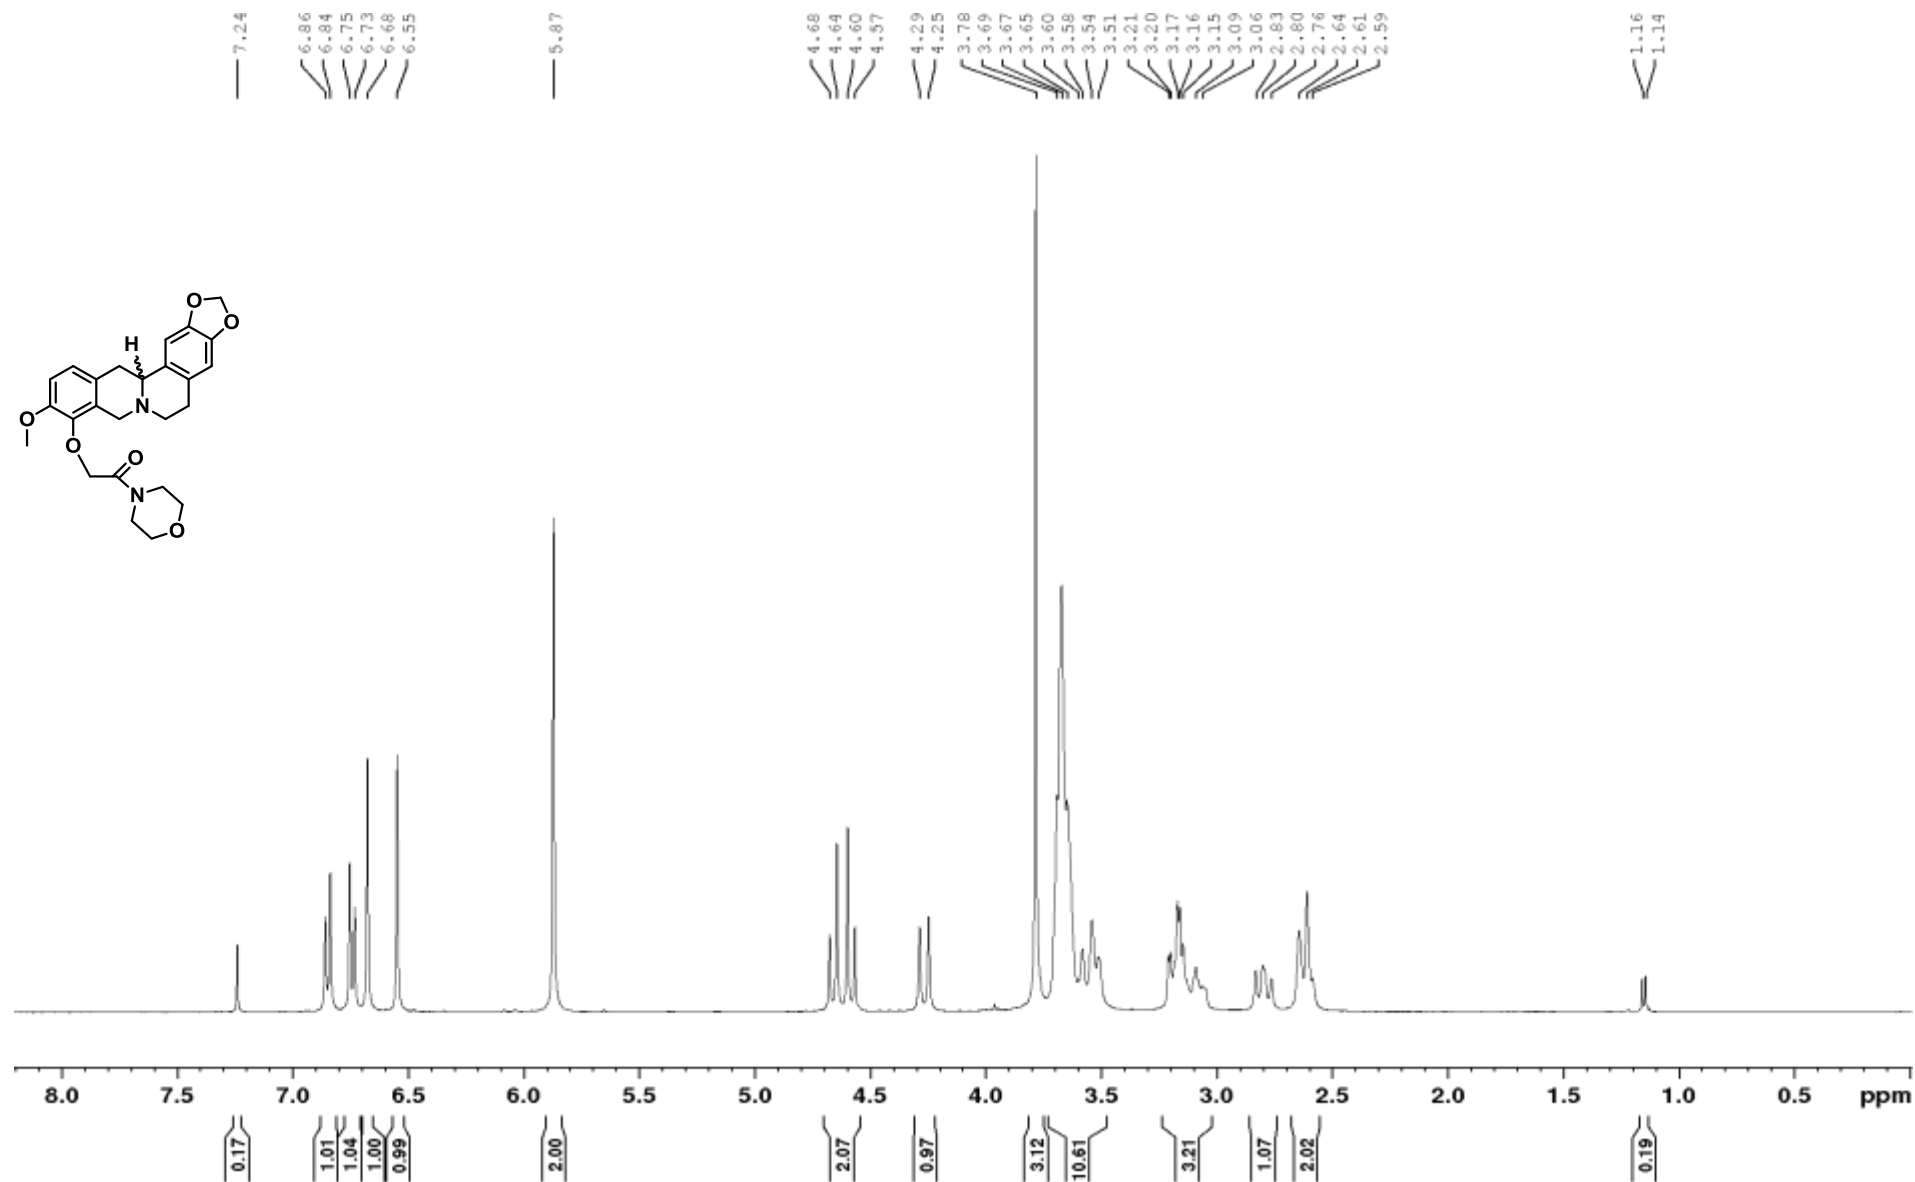

**Fig. S18.** Spectrum of Compound **3g**,  $^{13}\text{C}$  NMR (100 MHz,  $\text{CDCl}_3$ )

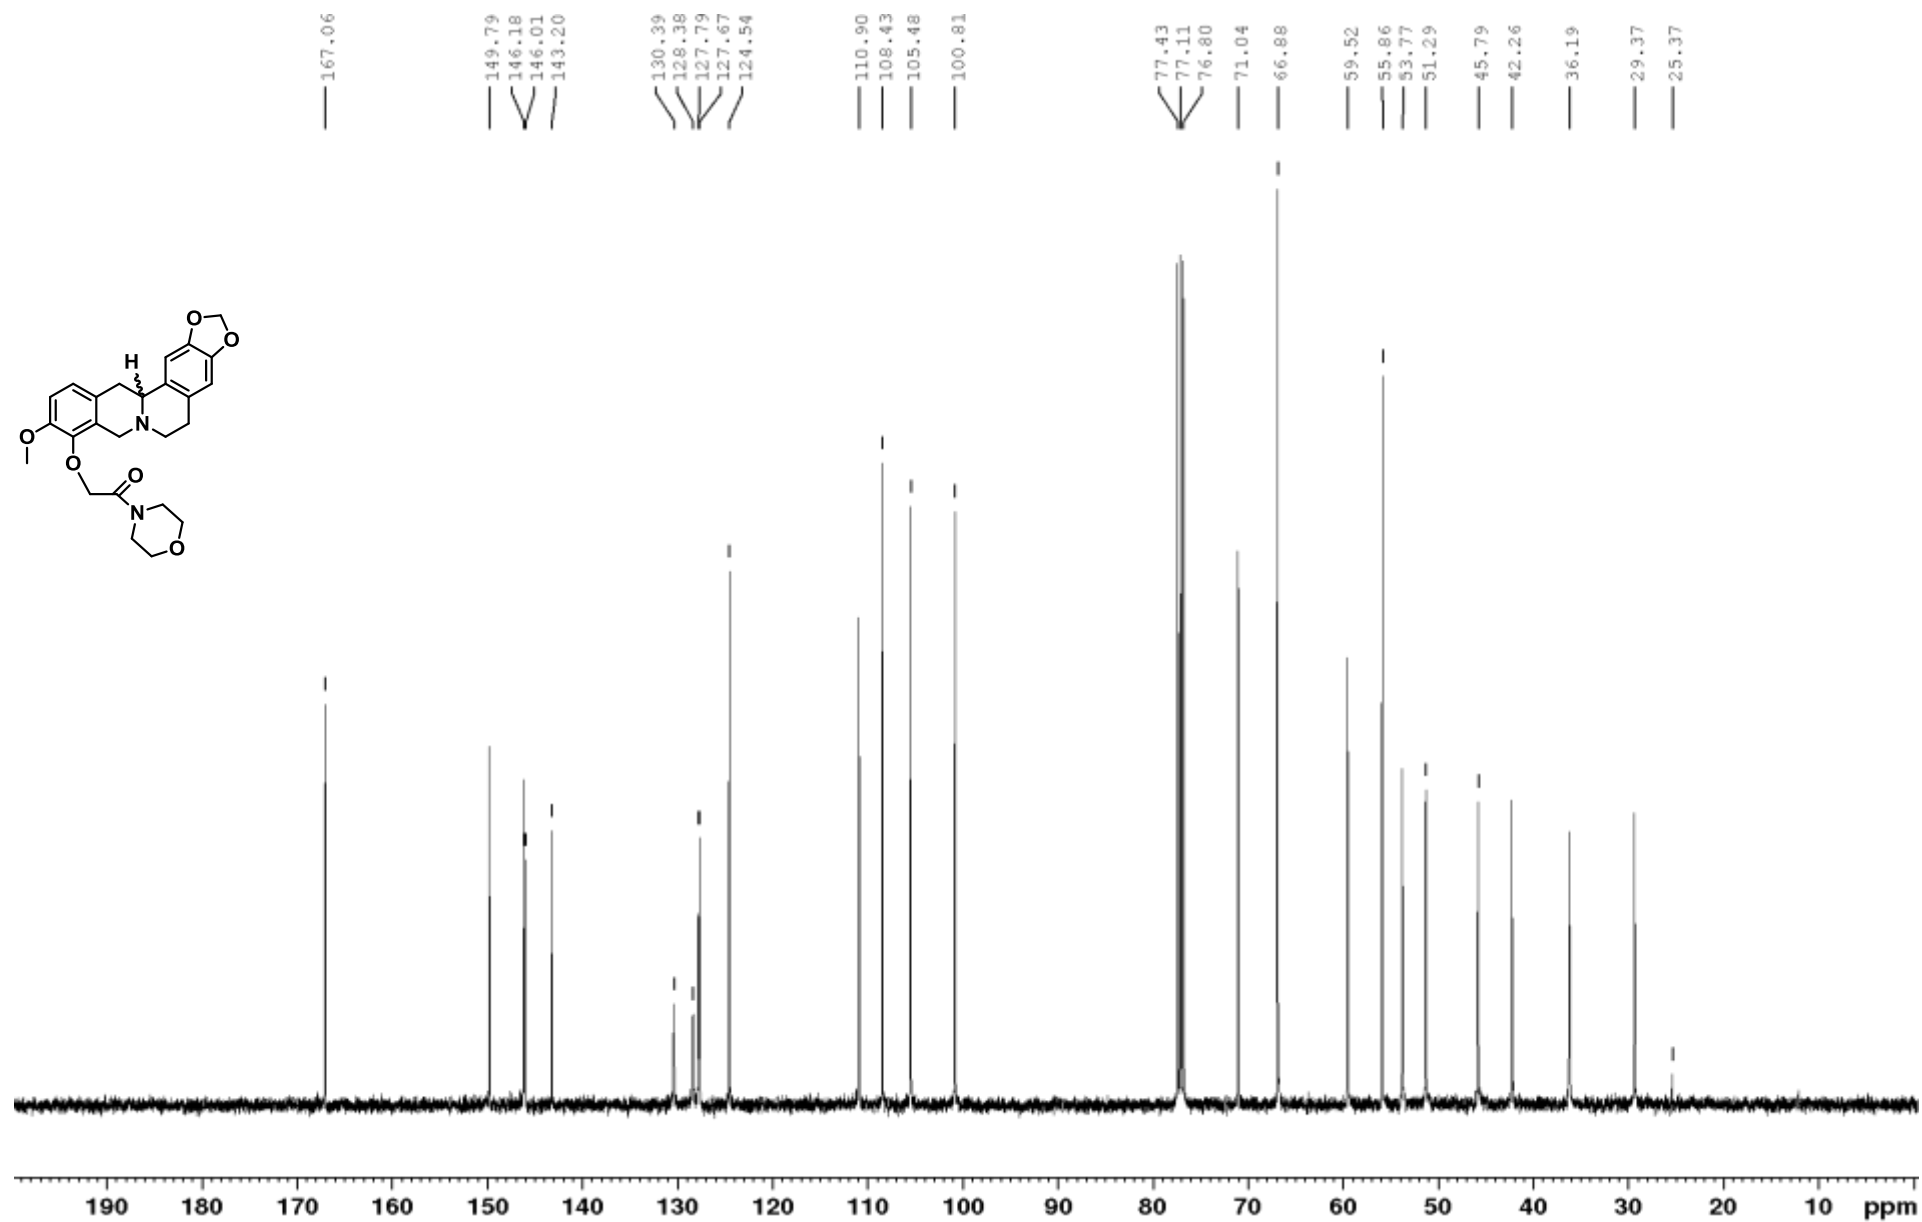

Supplement: Supplementary file 1 [file supplementary]
